# Supplementary material for: Stereoselective synthesis of oxime containing Pd(ii) compounds: highly effective, selective and stereo-regulated cytotoxicity against carcinogenic PC-3 cells
Source: Royal Society of Chemistry journal article supplement (doi:10.1039/d2dt01403c), 2022-01-01
Supplement: d2dt01403c1.pdf [file d2dt01403c1.pdf]

## Electronic Supplementary Information

### **Stereoselective synthesis of oxime containing Pd(II) compounds: Highly effective, selective and stereo-regulated cytotoxicity against carcinogenic PC-3 cells**

Isabel de la Cueva-Alique,<sup>a</sup> Elena de la Torre-Rubio,<sup>a</sup> Laura Muñoz-Moreno,<sup>b</sup> Alicia Calvo-Jareño,<sup>a</sup> Adrián Pérez-Redondo,<sup>a</sup> Lourdes Gude,<sup>a</sup> Tomás Cuenca,<sup>a</sup> Eva Royo\*<sup>a</sup>

<sup>a</sup> Universidad de Alcalá, Instituto de Investigación Química “Andrés M. del Río” (IQAR), Departamento de Química Orgánica y Química Inorgánica, 28805 Alcalá de Henares, Madrid, Spain

<sup>b</sup> Departamento de Biología de Sistemas, Facultad de Medicina y Ciencias de la Salud, Universidad de Alcalá, 28805 Alcalá de Henares, Madrid, Spain

#### **Selected characterization data:**

1. Tables S1-S5 and Figure S1: Single-crystal X-ray diffraction data.
2. Figure S2: Numbered cyclohexane skeleton of amino oxime proligands.
3. Figure S3-S6: Selected NMR spectra of proligands **a**, **b** and **a'**, **b'**.
4. Figures S7-S15: Selected NMR spectra of **1a** and **1a'** in chloroform-d1.
5. Figures S16-S22: Selected NMR spectra of **1b** and **1b'** in chloroform-d1.
6. Figure S23-S29: Selected NMR spectra of **2a** and **2a'** in chloroform-d1
7. Figure S30-S37: Selected NMR spectra of **2b** and **2b'** in chloroform-d1
8. Figure S38: Time-dependent <sup>1</sup>H NMR spectra, (pH\* = 7.4) of **2b-1** + **2b'-2** in water-d2
9. Figure S39-S40: <sup>1</sup>H NMR spectra of **2b-1** + **2b-2** in water-d2 or methanol-d4
10. Figure S41-43: Selected NMR characterization spectra of **2b** in water-d2
11. Figure S44-46: Selected NMR characterization spectra of **2b** in methanol-d4
12. Figures S47-S50: Time dependent UV-vis spectra of **1a**, **1b**, **2a** and **2b** in water (spectra of **a-HCl** and **b-HCl** are included for comparison)
13. Figure S51-S53: HR-ESI-MS spectra of **2a**, **2a'** and **2b**

**Selected FRET DNA melting assay data:**

**Figure S54:** FRET DNA melting curves of **2a**, **2a'**, **2b** and **2b'** with representative ds DNA (F10T)

**Cell cycle assay data:**

**Figure S55:** Analysis of cell cycle of PC-3 cells after treatment with cisplatin, **2a** and **2a'**.

**Table S1.** Selected Lengths (Å) and Angles (deg) for **1a-1** and **1a'-1**.

|                   | <b>1a-1</b> | <b>1a'-1</b> |
|-------------------|-------------|--------------|
| Pd(1)–Cl(1)       | 2.274(2)    | 2.273(2)     |
| Pd(1)–Cl(2)       | 2.294(2)    | 2.294(2)     |
| Pd(1)–N(1)        | 2.048(5)    | 2.046(5)     |
| Pd(1)–N(2)        | 1.992(6)    | 1.990(6)     |
| N(2)–O(1)         | 1.378(7)    | 1.379(7)     |
| C(1)–C(2)         | 1.532(9)    | 1.519(9)     |
| Cl(1)–Pd(1)–Cl(2) | 92.9(1)     | 92.9(1)      |
| Cl(1)–Pd(1)–N(1)  | 92.0(2)     | 92.0(2)      |
| Cl(1)–Pd(1)–N(2)  | 172.3(2)    | 172.3(2)     |
| Cl(2)–Pd(1)–N(1)  | 173.5(2)    | 173.7(2)     |
| Cl(2)–Pd(1)–N(2)  | 94.0(2)     | 94.0(2)      |
| N(1)–Pd(1)–N(2)   | 81.3(2)     | 81.4(2)      |
| Pd(1)–N(1)–C(1)   | 108.8(4)    | 108.7(4)     |
| Pd(1)–N(2)–C(2)   | 118.7(5)    | 118.4(5)     |
| N(1)–C(1)–C(2)    | 108.0(5)    | 108.3(5)     |
| N(2)–C(2)–C(1)    | 116.1(6)    | 116.4(6)     |

**Table S2.** Selected Lengths (Å) and Angles (deg) for **1b**.

| <b>1b-1</b>       |           | <b>1b-2</b>         |           |
|-------------------|-----------|---------------------|-----------|
| Pd(1)–Cl(1)       | 2.297(2)  | Pd(2)–Cl(11)        | 2.278(3)  |
| Pd(1)–Cl(2)       | 2.293(2)  | Pd(2)–Cl(12)        | 2.297(2)  |
| Pd(1)–N(1)        | 2.049(7)  | Pd(2)–N(11)         | 2.052(8)  |
| Pd(1)–N(2)        | 1.996(7)  | Pd(2)–N(12)         | 1.972(7)  |
| N(2)–O(1)         | 1.371(8)  | N(12)–O(11)         | 1.381(9)  |
| C(1)–C(2)         | 1.506(12) | C(21)–C(22)         | 1.524(12) |
| Cl(1)–Pd(1)–Cl(2) | 94.8(1)   | Cl(11)–Pd(2)–Cl(12) | 91.8(1)   |
| Cl(1)–Pd(1)–N(1)  | 92.7(2)   | Cl(11)–Pd(2)–N(11)  | 98.4(2)   |
| Cl(1)–Pd(1)–N(2)  | 173.1(2)  | Cl(11)–Pd(2)–N(12)  | 177.5(2)  |
| Cl(2)–Pd(1)–N(1)  | 172.1(2)  | Cl(12)–Pd(2)–N(11)  | 169.6(2)  |
| Cl(2)–Pd(1)–N(2)  | 91.9(2)   | Cl(12)–Pd(2)–N(12)  | 90.7(2)   |
| N(1)–Pd(1)–N(2)   | 80.7(3)   | N(11)–Pd(2)–N(12)   | 79.1(3)   |
| Pd(1)–N(1)–C(1)   | 107.1(5)  | Pd(2)–N(11)–C(21)   | 108.6(5)  |
| Pd(1)–N(2)–C(2)   | 118.7(6)  | Pd(2)–N(12)–C(22)   | 120.0(6)  |
| N(1)–C(1)–C(2)    | 109.8(7)  | N(11)–C(21)–C(22)   | 106.4(7)  |
| N(2)–C(2)–C(1)    | 114.8(8)  | N(12)–C(22)–C(21)   | 114.6(8)  |

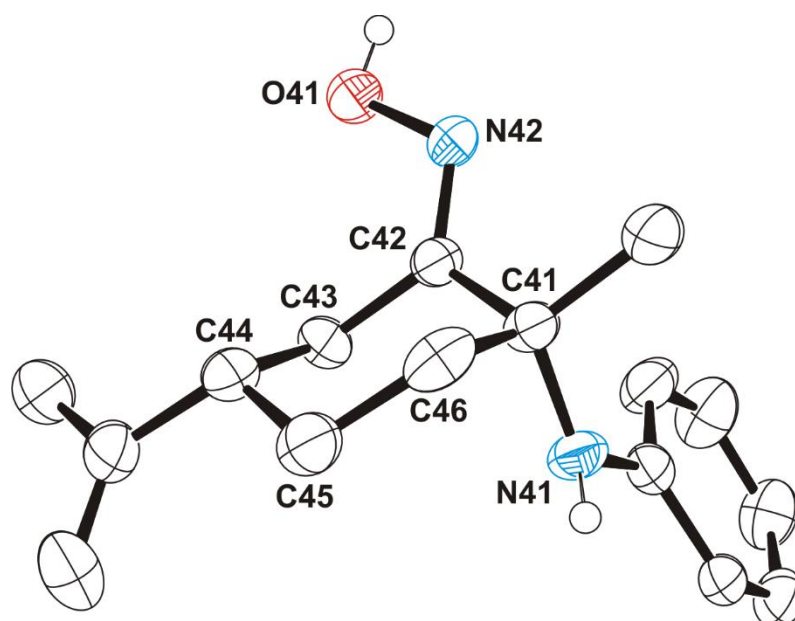

**Figure S1.** ORTEP drawing of the ligand which crystallized with compound **2a'** with 50% probability ellipsoids. Hydrogens bonded to carbon atoms have been omitted for clarity.

**Table S3.** Selected Lengths (Å) and Angles (deg) for **2a'**.

|                   |          |                   |          |
|-------------------|----------|-------------------|----------|
| Pd(1)–N(1)        | 2.077(3) | Pd(1)–N(21)       | 2.080(3) |
| Pd(1)–N(2)        | 1.973(3) | Pd(1)–N(22)       | 1.976(3) |
| N(2)–O(1)         | 1.355(4) | N(22)–O(21)       | 1.343(4) |
| C(1)–C(2)         | 1.507(6) | C(21)–C(22)       | 1.511(6) |
| N(42)–O(41)       | 1.416(5) | C(41)–C(42)       | 1.517(6) |
|                   |          |                   |          |
| N(1)–Pd(1)–N(2)   | 81.4(1)  | N(21)–Pd(1)–N(22) | 81.1(1)  |
| N(1)–Pd(1)–N(21)  | 101.2(1) | N(2)–Pd(1)–N(22)  | 95.9(1)  |
| N(1)–Pd(1)–N(22)  | 176.2(1) | N(2)–Pd(1)–N(21)  | 172.6(1) |
| Pd(1)–N(1)–C(1)   | 110.7(2) | Pd(1)–N(21)–C(21) | 107.7(2) |
| Pd(1)–N(2)–C(2)   | 118.6(3) | Pd(1)–N(22)–C(22) | 119.0(3) |
| N(1)–C(1)–C(2)    | 109.3(3) | N(21)–C(21)–C(22) | 108.7(3) |
| N(2)–C(2)–C(1)    | 117.1(4) | N(22)–C(22)–C(21) | 116.3(4) |
| N(41)–C(41)–C(42) | 111.7(4) | N(42)–C(42)–C(41) | 117.3(4) |

**Table S4.** Relevant hydrogen bonds<sup>a</sup> for compounds **1a-1**, **1a'-1**, **1b-1**, **1b-2** and **2a'**

| Compound     | D–H...A              | D...A/Å  | H...A/Å | D–H...A/deg |
|--------------|----------------------|----------|---------|-------------|
| <b>1a-1</b>  | O(1)–H(1)···Cl(2)    | 3.182(6) |         |             |
| <b>1a'-1</b> | O(1)–H(1)···Cl(2)    | 3.179(6) |         |             |
| <b>1b-1</b>  | O(1)–H(1)···Cl(2)    | 3.086(7) |         |             |
| <b>1b-2</b>  | O(11)–H(11)···Cl(12) | 2.999(7) |         |             |
| <b>2a'</b>   | O(1)–H(1)···O(21)    | 2.438(4) | 1.36(6) | 173(5)      |

<sup>a</sup>A = acceptor; D = donor.

Single-crystal X-ray diffraction data:

**Table S5.** Experimental data for the X-ray diffraction studies on **1a-1**, **1a'-1**, **1b** and **2a'**.

|                                                 | <b>1a-1</b> ·2CHCl <sub>3</sub>                                    | <b>1a'-1</b> ·2CHCl <sub>3</sub>                                   | <b>1b</b>                                                          | <b>2a'</b> ·C <sub>16</sub> H <sub>22</sub> N <sub>2</sub> O       |
|-------------------------------------------------|--------------------------------------------------------------------|--------------------------------------------------------------------|--------------------------------------------------------------------|--------------------------------------------------------------------|
| CCDC code                                       | 2129232                                                            | 2129233                                                            | 2129234                                                            | 2129235                                                            |
| Formula                                         | C <sub>18</sub> H <sub>24</sub> Cl <sub>8</sub> N <sub>2</sub> OPd | C <sub>18</sub> H <sub>24</sub> Cl <sub>8</sub> N <sub>2</sub> OPd | C <sub>17</sub> H <sub>24</sub> Cl <sub>2</sub> N <sub>2</sub> OPd | C <sub>48</sub> H <sub>65</sub> ClN <sub>6</sub> O <sub>3</sub> Pd |
| <i>M<sub>r</sub></i>                            | 674.39                                                             | 674.39                                                             | 449.68                                                             | 915.91                                                             |
| <i>T</i> [K]                                    | 200(2)                                                             | 200(2)                                                             | 200(2)                                                             | 200(2)                                                             |
| <i>λ</i> [Å]                                    | 0.71073                                                            | 0.71073                                                            | 0.71073                                                            | 0.71073                                                            |
| crystal system                                  | Monoclinic                                                         | Monoclinic                                                         | Orthorhombic                                                       | Orthorhombic                                                       |
| space group                                     | <i>P</i> 2 <sub>1</sub>                                            | <i>P</i> 2 <sub>1</sub>                                            | <i>P</i> 2 <sub>1</sub> 2 <sub>1</sub> 2 <sub>1</sub>              | <i>P</i> 2 <sub>1</sub> 2 <sub>1</sub> 2 <sub>1</sub>              |
| <i>a</i> [Å]; <i>α</i> [°]                      | 8.409(1)                                                           | 8.407(1)                                                           | 10.597(1)                                                          | 13.050(1)                                                          |
| <i>b</i> [Å]; <i>β</i> [°]                      | 12.953(2); 96.87(1)                                                | 12.955(1); 96.86(1)                                                | 12.258(1)                                                          | 15.813(1)                                                          |
| <i>c</i> [Å]; <i>γ</i> [°]                      | 12.427(1)                                                          | 12.424(1)                                                          | 28.259(2)                                                          | 22.414(1)                                                          |
| <i>V</i> [Å <sup>3</sup> ]                      | 1343.8(2)                                                          | 1343.5(2)                                                          | 3670.5(6)                                                          | 4625.1(7)                                                          |
| <i>Z</i>                                        | 2                                                                  | 2                                                                  | 8                                                                  | 4                                                                  |
| <i>ρ</i> <sub>calcd</sub> [g cm <sup>-3</sup> ] | 1.667                                                              | 1.667                                                              | 1.627                                                              | 1.315                                                              |
| <i>μ</i> <sub>MoKα</sub> [mm <sup>-1</sup> ]    | 1.500                                                              | 1.500                                                              | 1.307                                                              | 0.506                                                              |
| <i>F</i> (000)                                  | 672                                                                | 672                                                                | 1824                                                               | 1928                                                               |
| crystal size [mm <sup>3</sup> ]                 | 0.40×0.21×0.17                                                     | 0.34×0.23×0.19                                                     | 0.26×0.24×0.16                                                     | 0.24×0.18×0.16                                                     |
| <i>θ</i> range (deg)                            | 3.11 to 27.50                                                      | 3.11 to 27.50                                                      | 3.32 to 27.50                                                      | 3.01 to 27.50                                                      |
| index ranges                                    | -10 to 10,<br>-16 to 16,<br>-16 to 16                              | -10 to 10,<br>-16 to 16,<br>-16 to 16                              | -13 to 13,<br>-15 to 15,<br>-36 to 33                              | -16 to 16,<br>-20 to 20,<br>-28 to 29                              |
| Reflections collected                           | 29581                                                              | 30348                                                              | 45975                                                              | 58204                                                              |
| Unique data                                     | 6100 [R <sub>int</sub> = 0.074]                                    | 6157 [R <sub>int</sub> = 0.058]                                    | 8411 [R <sub>int</sub> = 0.086]                                    | 10580 [R <sub>int</sub> = 0.055]                                   |
| obsd data [I>2σ(I)]                             | 5146                                                               | 5139                                                               | 6361                                                               | 8989                                                               |
| Goodness-of-fit on <i>F</i> <sup>2</sup>        | 1.166                                                              | 1.132                                                              | 1.087                                                              | 1.101                                                              |
| final <i>R<sup>a</sup></i> indices [I>2σ(I)]    | R1 = 0.042,<br>wR2 = 0.086                                         | R1 = 0.040,<br>wR2 = 0.078                                         | R1 = 0.053,<br>wR2 = 0.095                                         | R1 = 0.037,<br>wR2 = 0.064                                         |
| <i>R<sup>a</sup></i> indices (all data)         | R1 = 0.062,<br>wR2 = 0.098                                         | R1 = 0.062,<br>wR2 = 0.090                                         | R1 = 0.087,<br>wR2 = 0.109                                         | R1 = 0.055,<br>wR2 = 0.071                                         |
| largest diff. peak/hole [e.Å <sup>-3</sup> ]    | 1.892/-1.157                                                       | 1.796/-0.757                                                       | 1.019/-0.842                                                       | 0.700/-0.494                                                       |

<sup>a</sup>  $R1 = \sum ||F_o| - |F_c|| / \sum |F_o|$   $wR2 = \{[\sum w(F_o^2 - F_c^2)^2] / [\sum w(F_o^2)^2]\}^{1/2}$

**Figure S2.** Numbering of cyclohexane skeleton of amino oxime proligands.

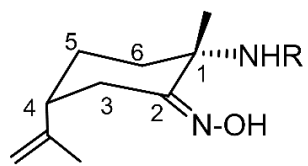

R = Ph (**a**), Bn (**b**)

Figure S3.  $^1\text{H}$  NMR spectrum of **a** in  $\text{CDCl}_3$ .<sup>1</sup>

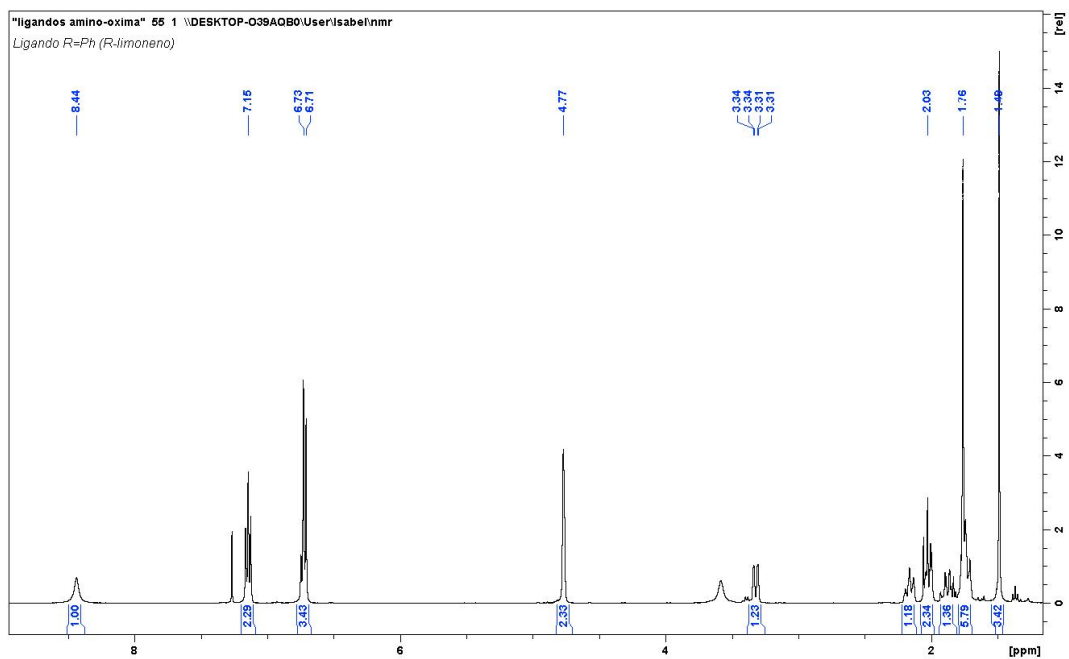

Figure S4.  $^1\text{H}$  NMR spectrum of **a'** in  $\text{CDCl}_3$ .

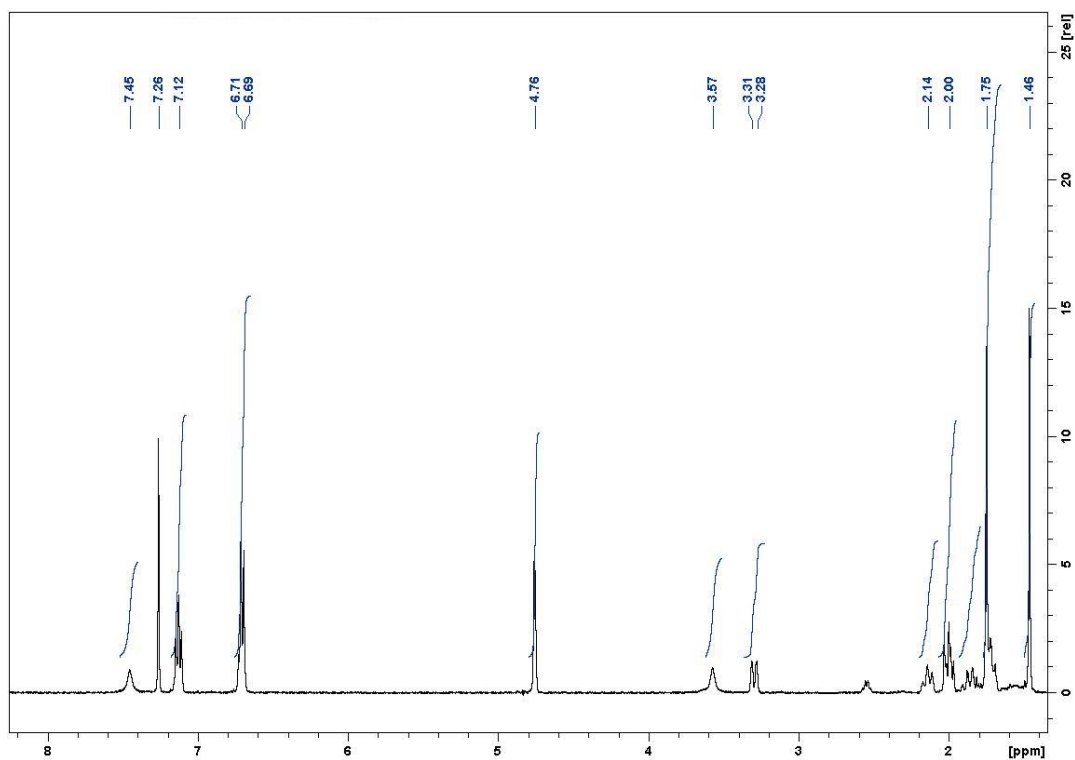

<sup>1</sup> Chemical shifts of  $\text{NOH}$  and  $\text{NH}$  protons can vary depending on the sample concentration. This behavior is also observed in NMR spectra of oxime metal compounds.

Figure S5. <sup>1</sup>H NMR spectrum of **b** in CDCl<sub>3</sub>.

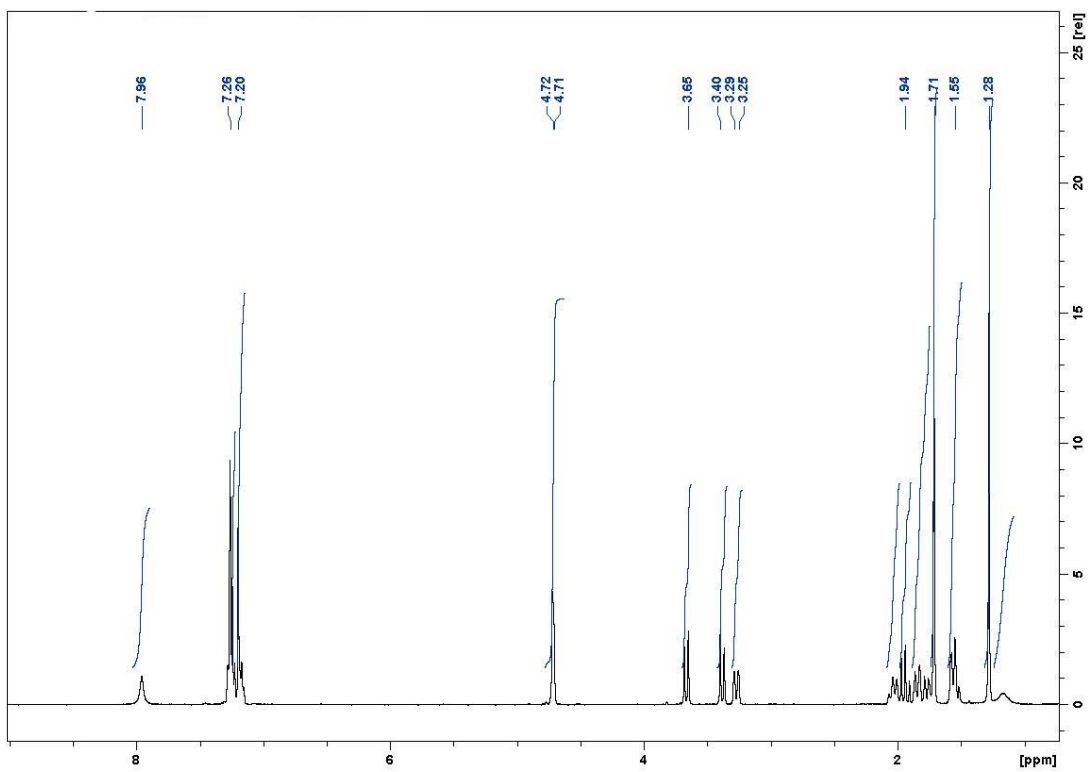

Figure S6. <sup>1</sup>H NMR spectrum of **b'** in CDCl<sub>3</sub>.

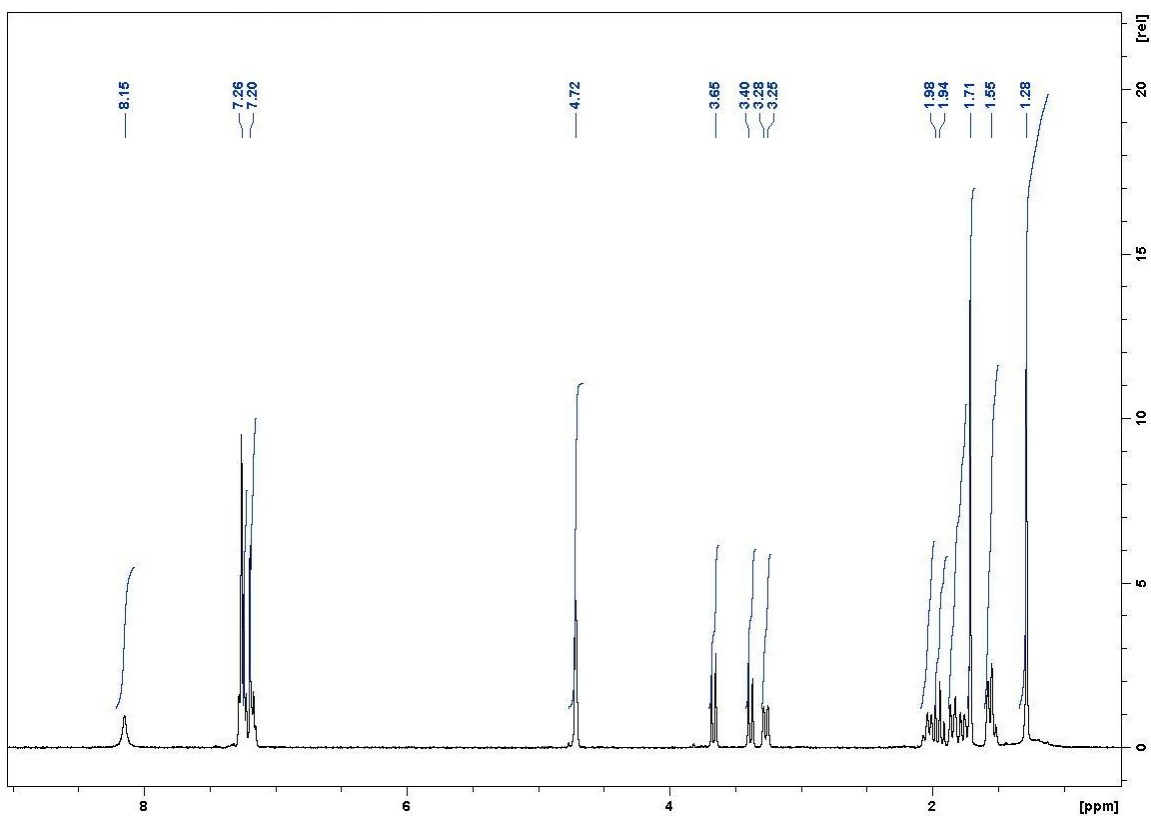



**Figure S7.**  $^1\text{H}$  NMR spectrum of pure **1a-1** in  $\text{CDCl}_3$  (re-dissolved crystals).

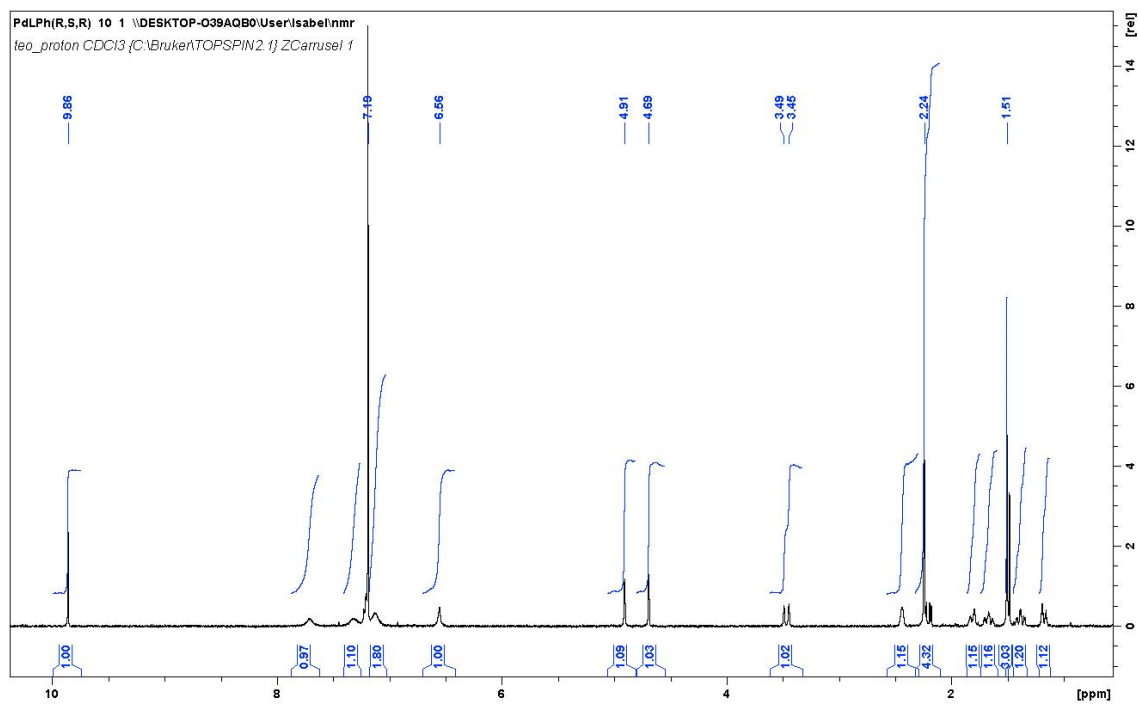

**Figure S8.**  $^1\text{H}$ - $^{15}\text{N}$  HMBC NMR spectrum of pure **1a-1** in  $\text{CDCl}_3$  (re-dissolved crystals).

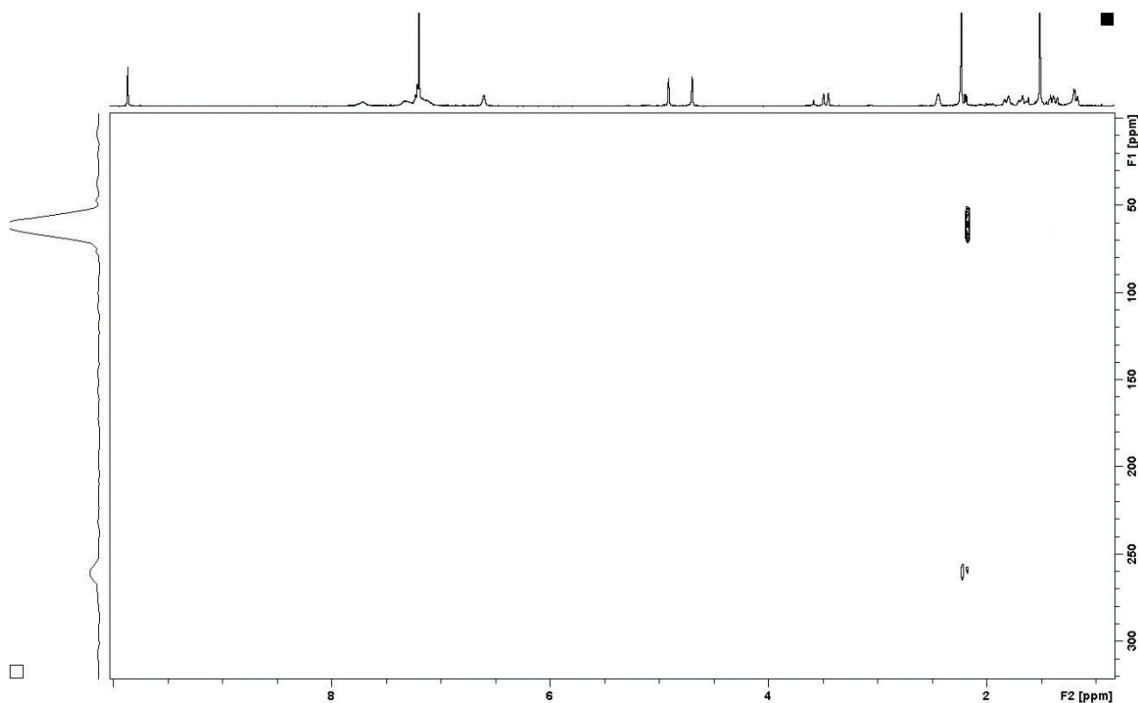

**Figure S9.**  $^{13}\text{C}$  APT NMR spectrum of pure **1a-1** in  $\text{CDCl}_3$  (re-dissolved crystals)

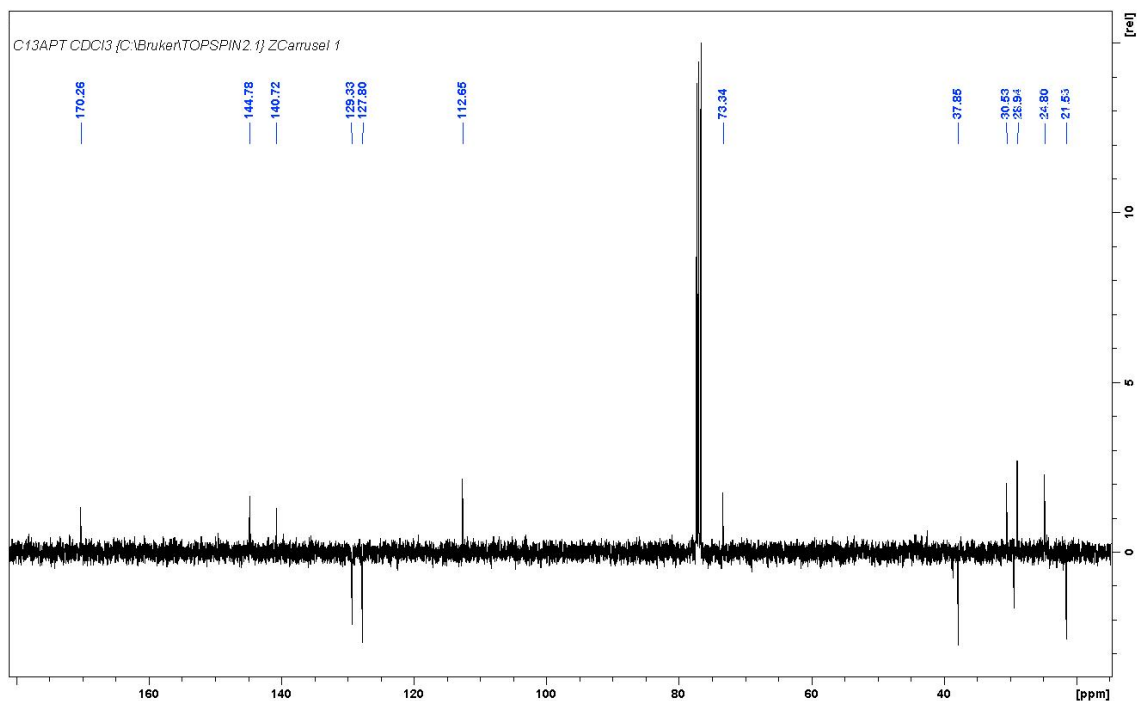

**Figure S10.**  $^1\text{H}$  NMR spectrum of **1a-1** (major) + **1a-2** (minor) in  $\text{CDCl}_3$  (crude solid obtained from synthetic reaction).

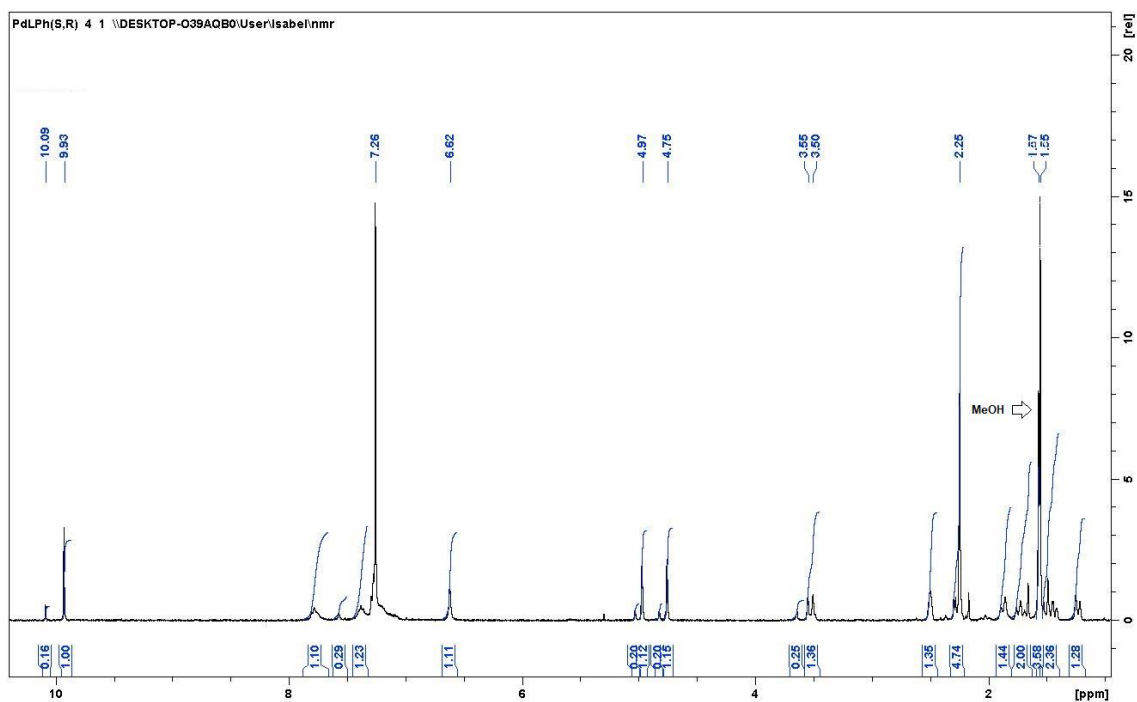

**Figure S11.**  $^1\text{H}$  NMR spectrum of **1a<sup>1</sup>-1** (major) + **1a<sup>1</sup>-2** (minor) in  $\text{CDCl}_3$  (crude solid obtained from synthetic reaction).

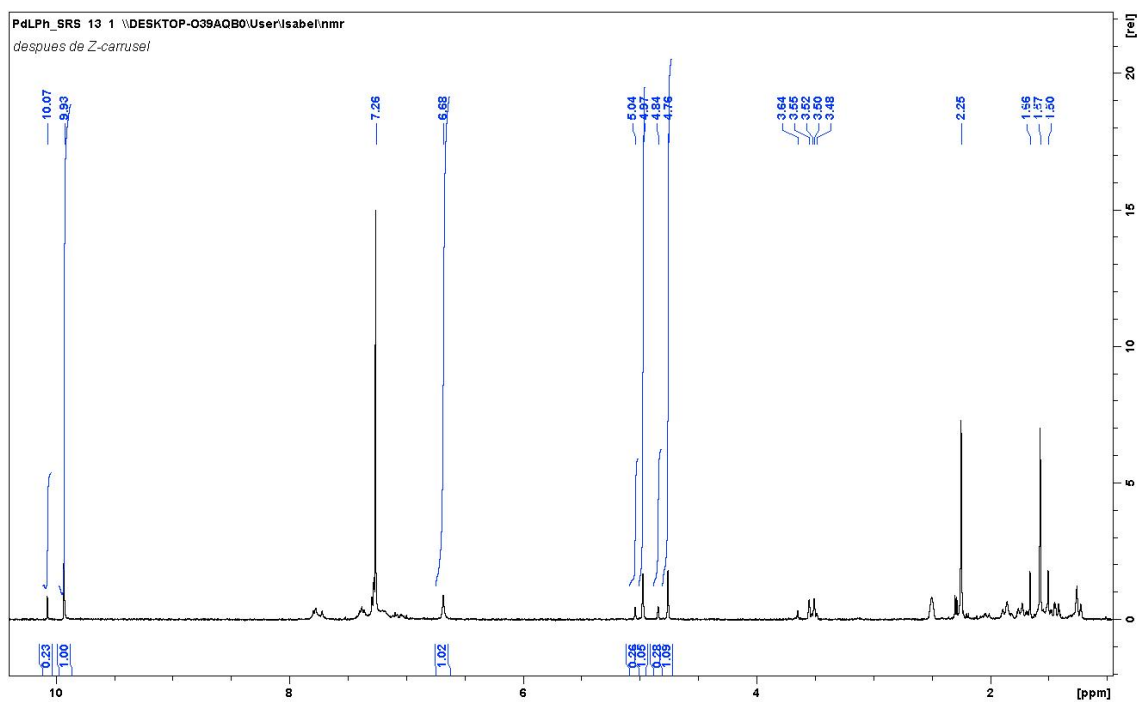

**Figure S12.**  $^1\text{H}$ - $^{15}\text{N}$  HMBC NMR spectrum of **1a-1** (major) + **1a-2** (minor) in  $\text{CDCl}_3$  (crude solid obtained from the synthetic reaction), (full and expanded). Example of  $\text{CH}_3\text{CqNH}$  and  $\text{CH}_2(3)$  assignment.

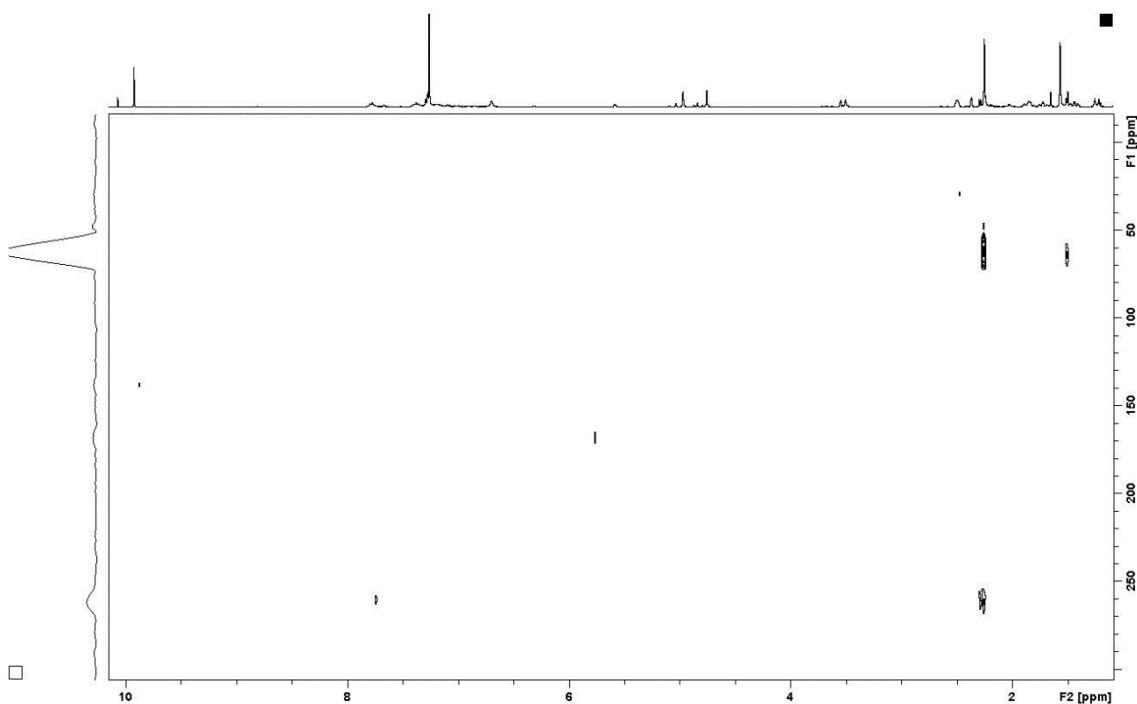

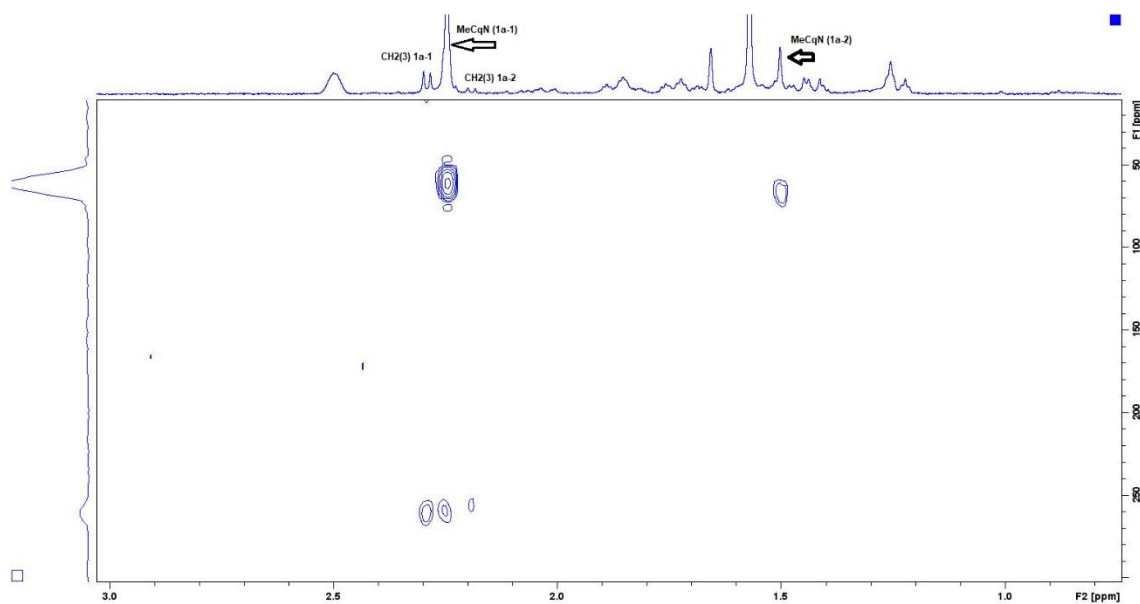

**Figure S13.**  $^{13}\text{C}$  APT NMR spectrum of **1a-1** (major) + **1a-2** (minor) in  $\text{CDCl}_3$  (crude solid obtained from synthetic reaction) (full and expanded).

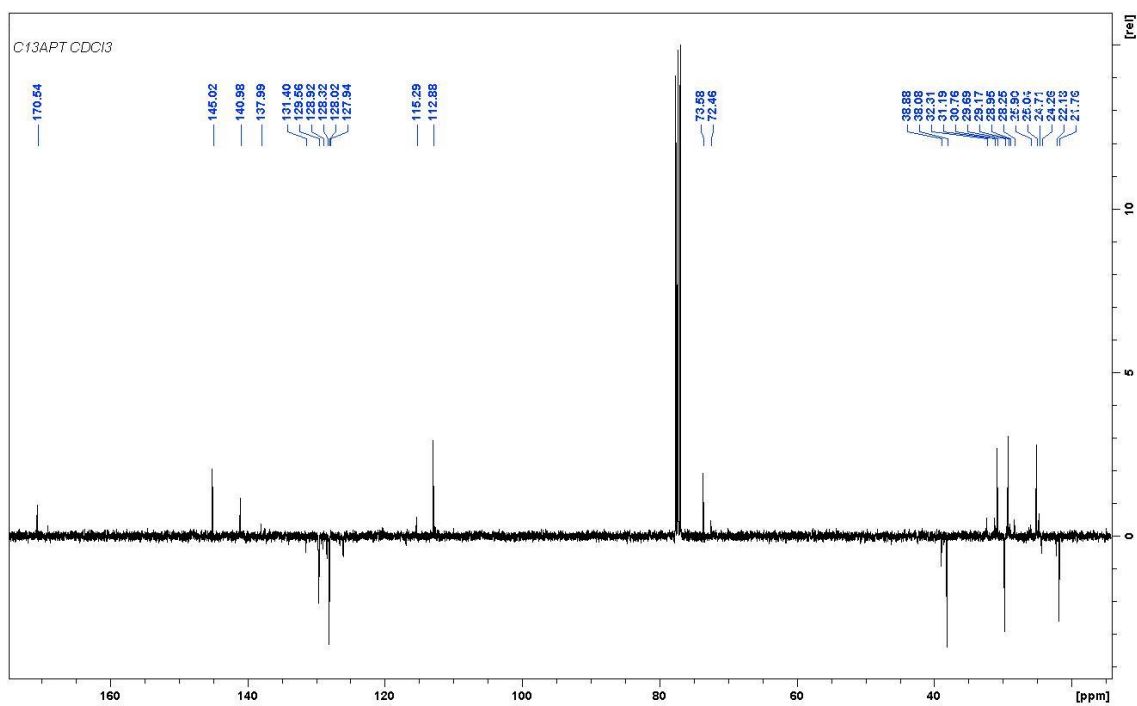

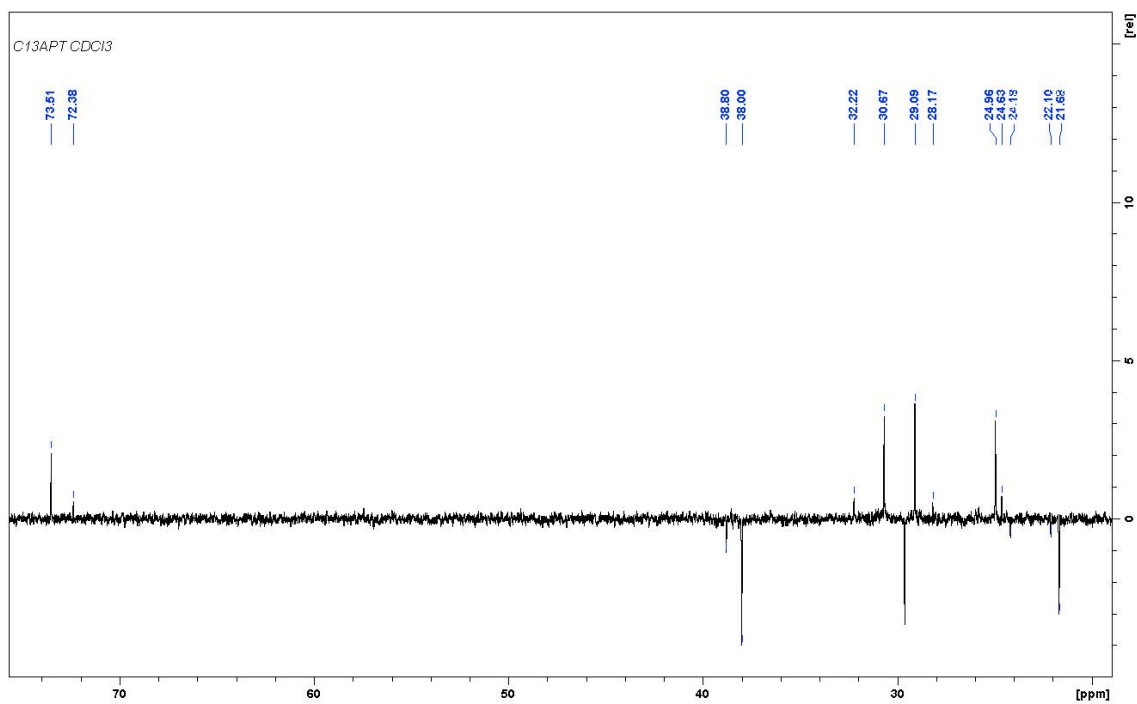

**Figure S14.**  $^1\text{H}$ - $^{13}\text{C}$  HSQC NMR spectrum of **1a-1** (major) + **1a-2** (minor) in  $\text{CDCl}_3$  (crude solid obtained from synthetic reaction).

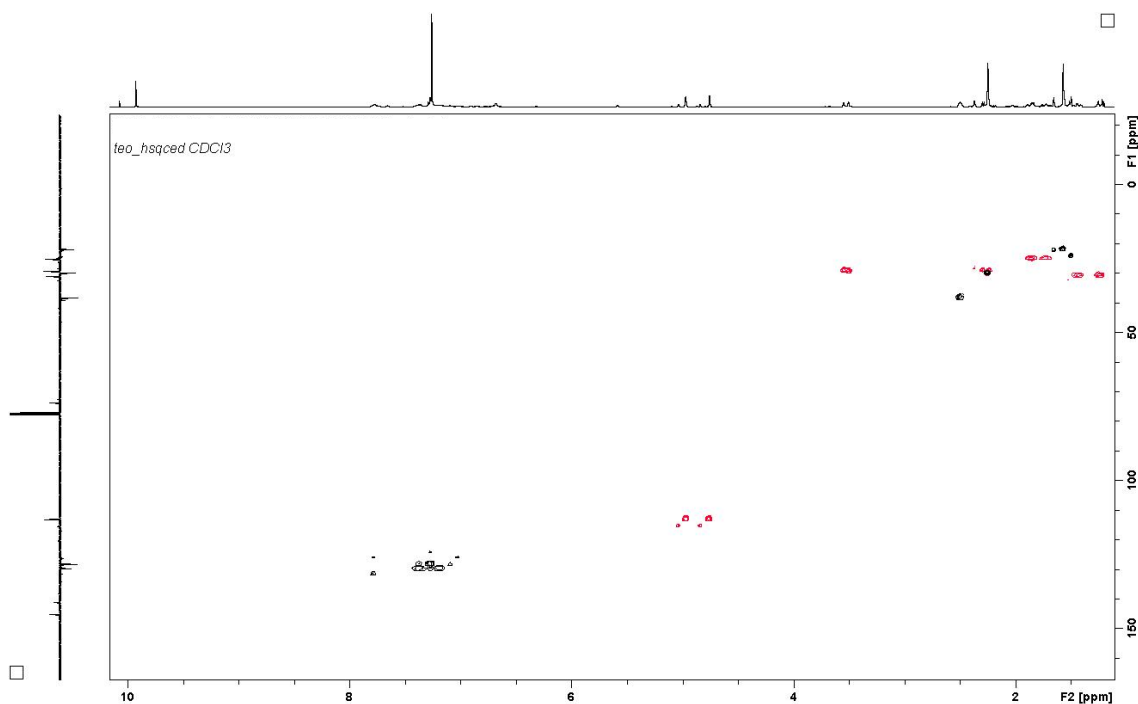

**Figure S15.**  $^1\text{H}$ - $^1\text{H}$  NOESY NMR spectrum of **1a-1** (major) + **1a-2** (minor) in  $\text{CDCl}_3$  (crude solid obtained from the synthesis reaction).

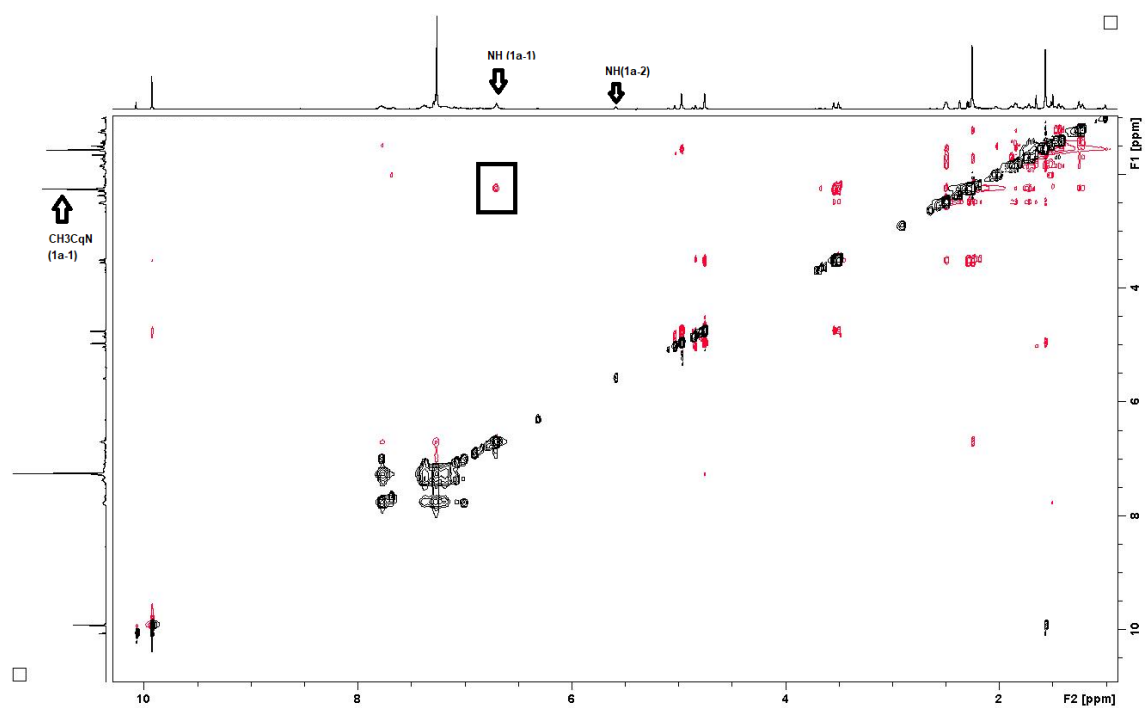

Figure S16.  $^1\text{H}$  NMR spectrum of **1b-1** (minor) + **1b-2** (major) in  $\text{CDCl}_3$ .

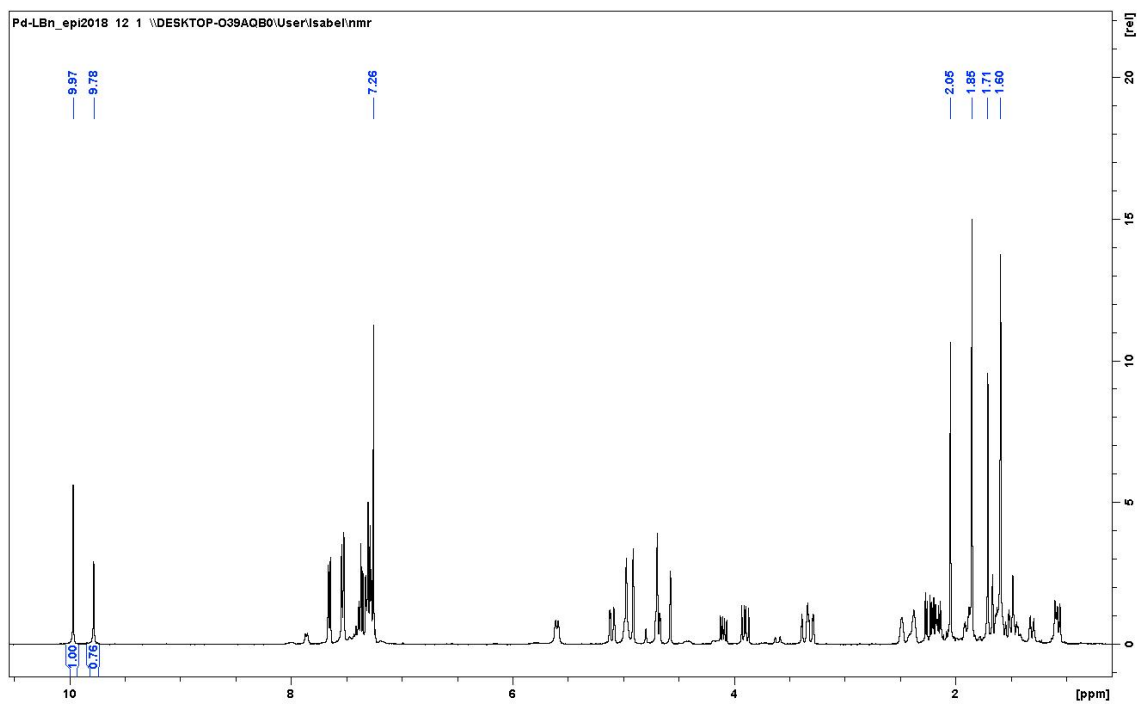

Figure S17.  $^1\text{H}$  NMR spectrum of **1b'-1** (minor) + **1b'-2** (major) in  $\text{CDCl}_3$ .

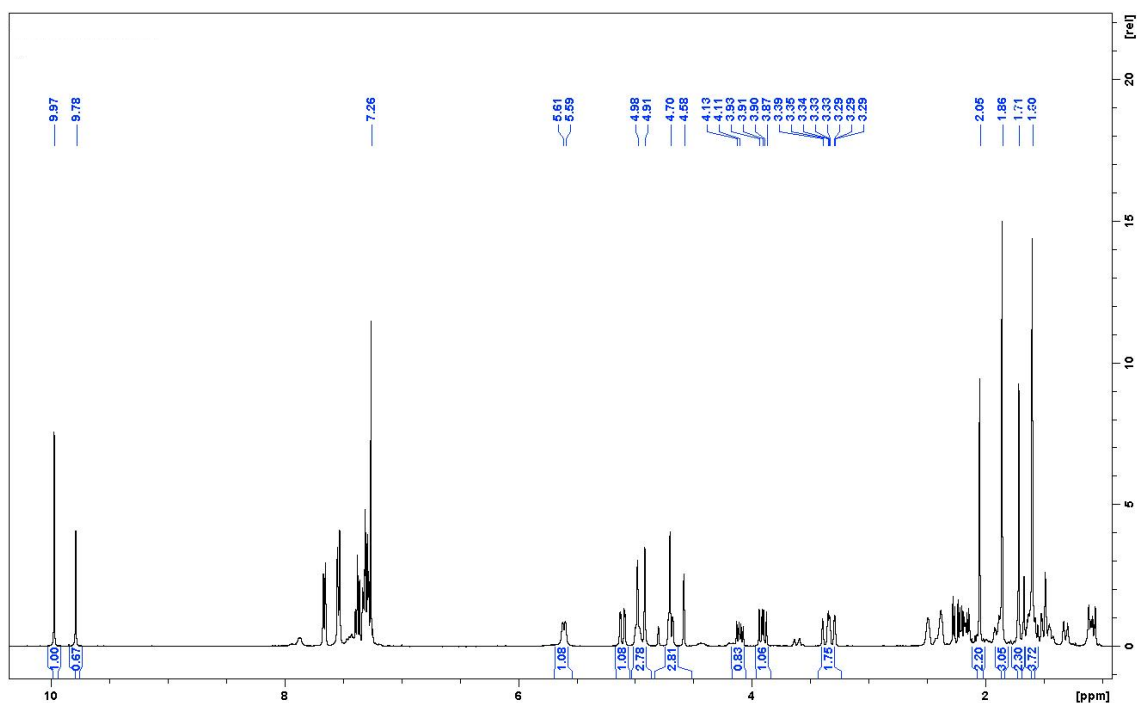

**Figure S18.**  $^1\text{H}$ - $^{15}\text{N}$  HMBC NMR spectrum of **1b-1** (minor) + **1b-2** (major) in  $\text{CDCl}_3$ .

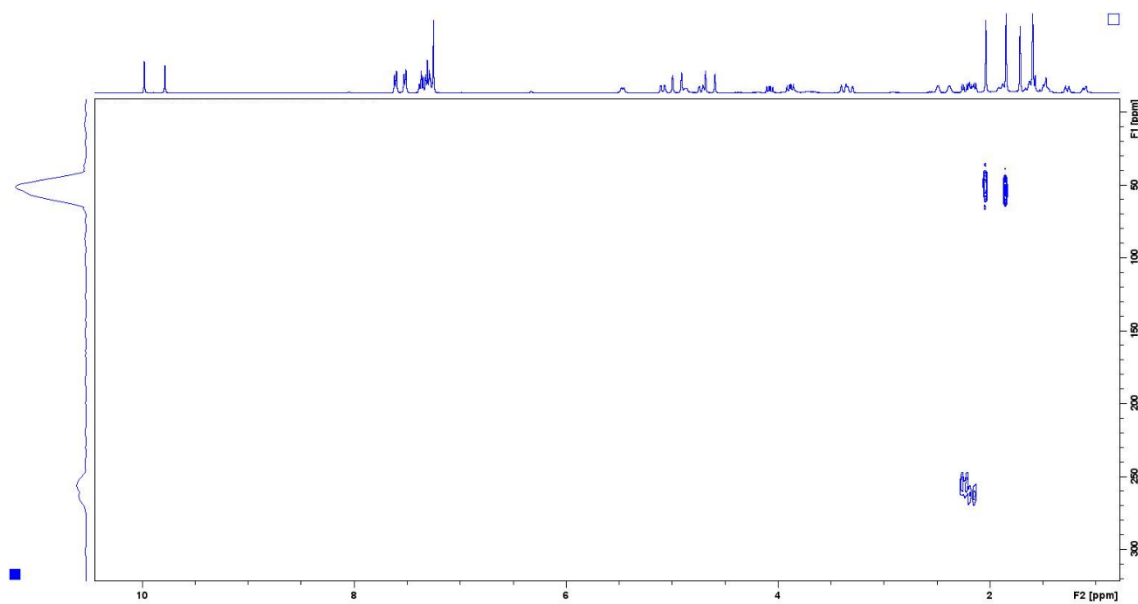

**Figure S19.**  $^1\text{H}$ - $^{13}\text{C}$  HSQC NMR spectrum of **1b-1** (minor) + **1b-2** (major) in  $\text{CDCl}_3$ .

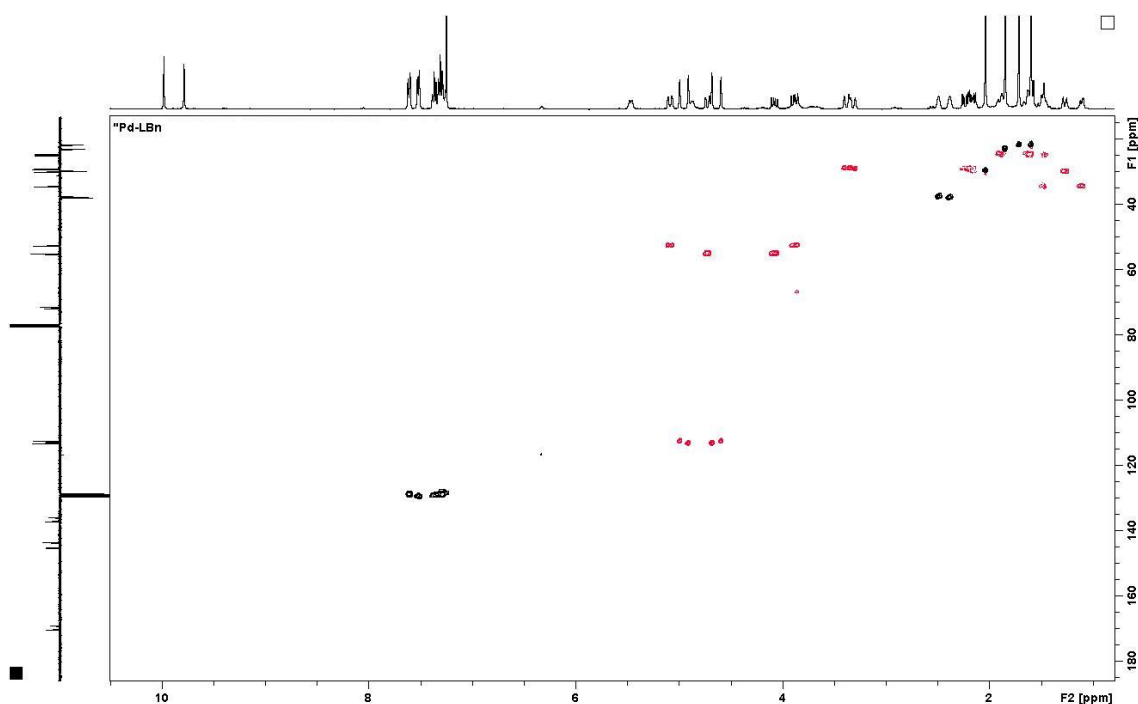



**Figure S20.**  $^1\text{H}$ - $^{13}\text{C}$  HMBC NMR spectrum of **1b-1** (minor) + **1b-2** (major) in  $\text{CDCl}_3$ . Example of  $\text{NOH}$  and  $\text{CH}_2(6)$  assignment.

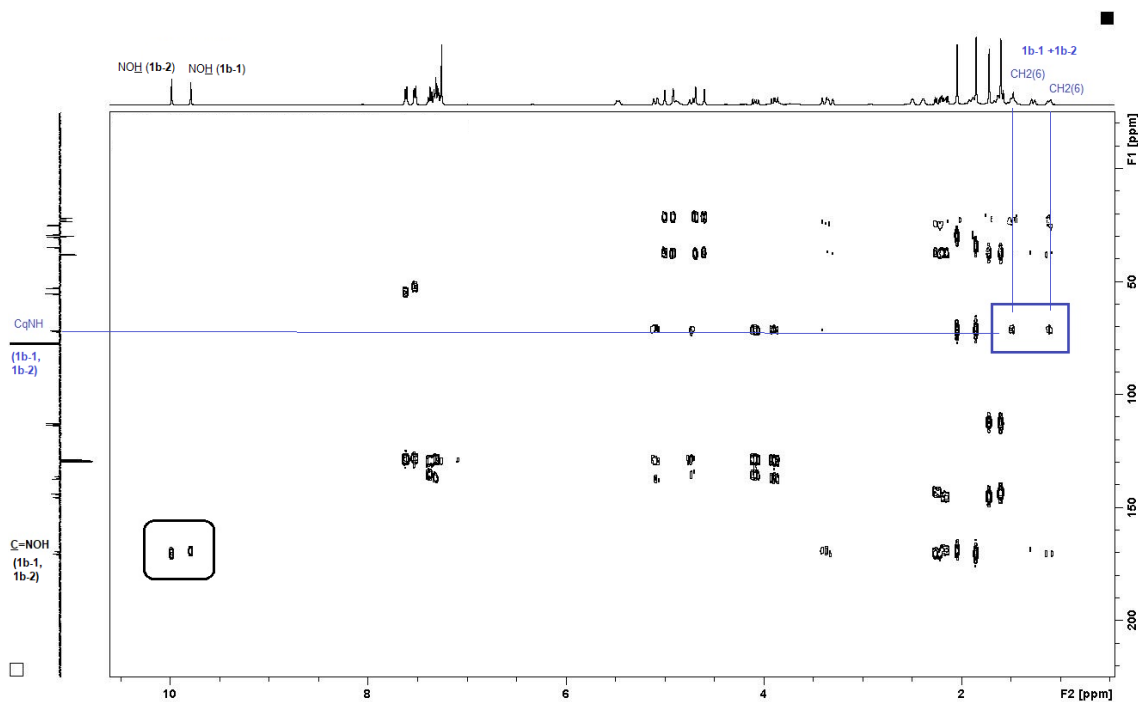

**Figure S21.**  $^1\text{H}$ - $^1\text{H}$  COSY NMR spectrum of **1b-1** (minor) +  $\text{1b-2}$  (major) in  $\text{CDCl}_3$  (example of  $\text{NH}$  assignment)

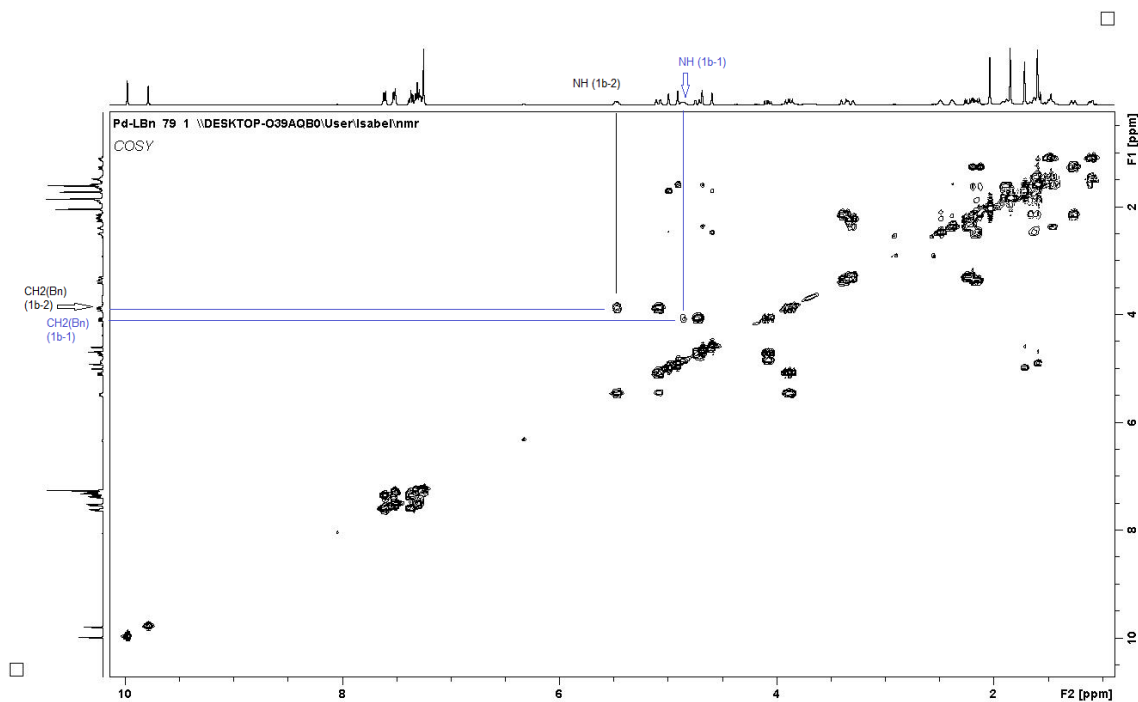

**Figure S22.**  $^1\text{H}$ - $^1\text{H}$  NOESY NMR spectrum of **1b-1** (minor) + **1b-2** (major) in  $\text{CDCl}_3$  (full and expanded)

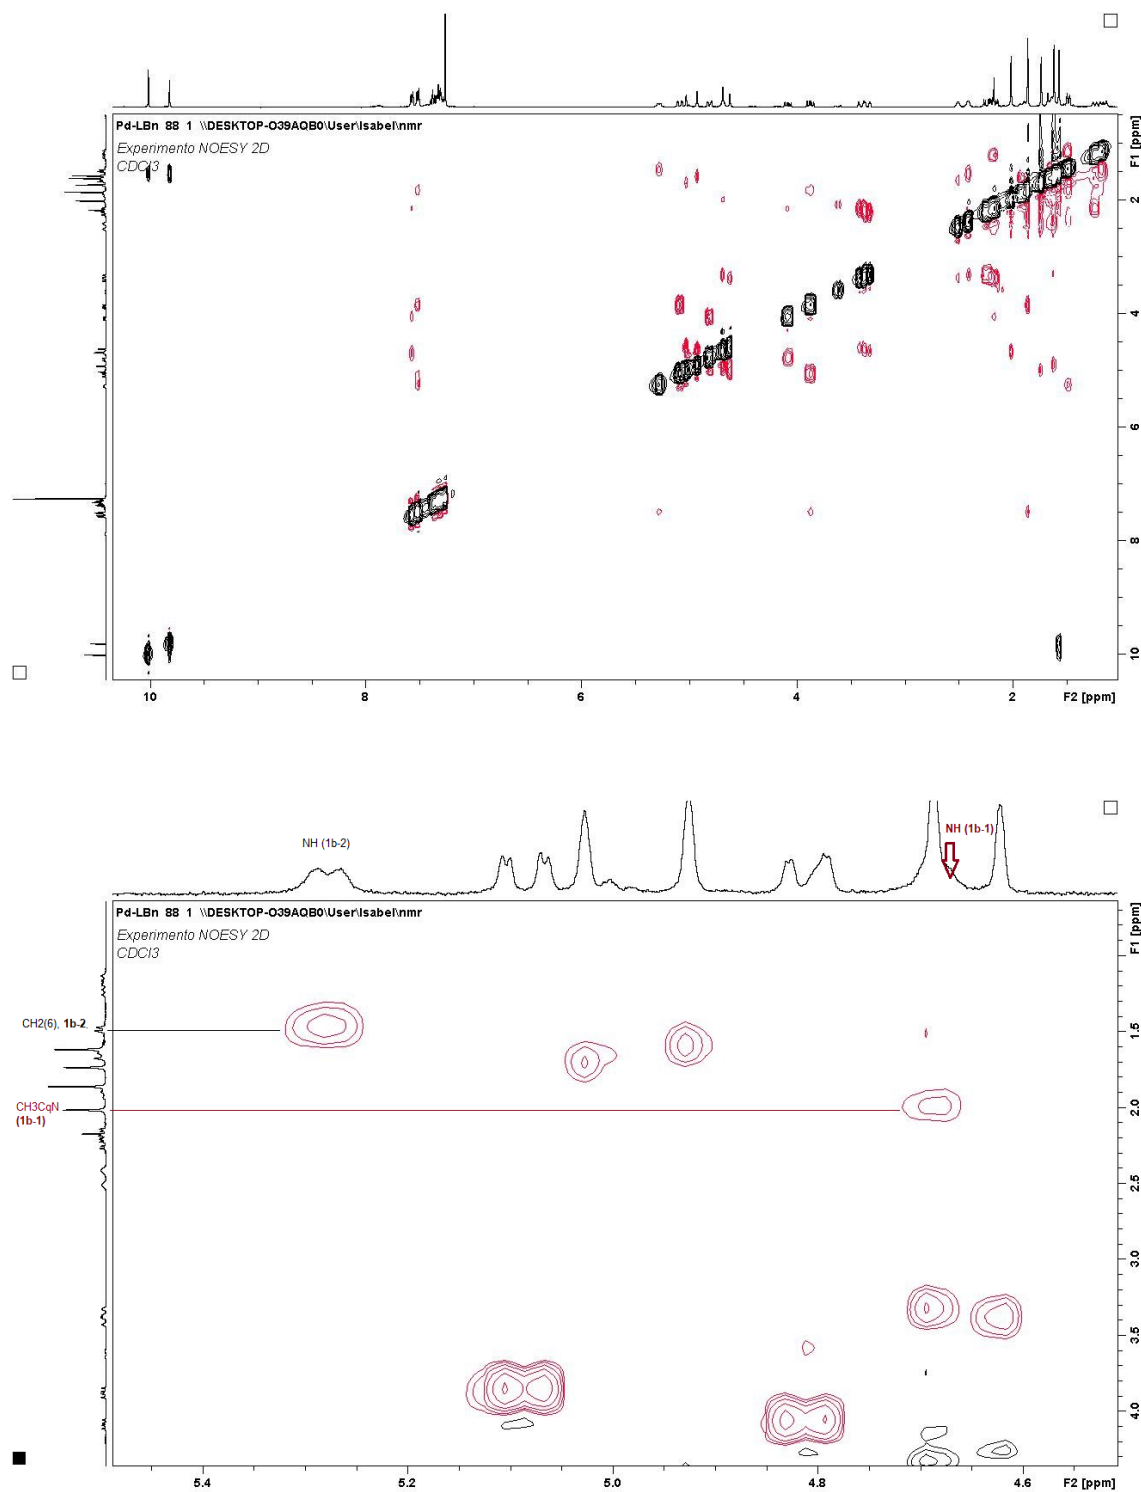

Figure S23. <sup>1</sup>H NMR spectrum of **2a** in CDCl<sub>3</sub>.

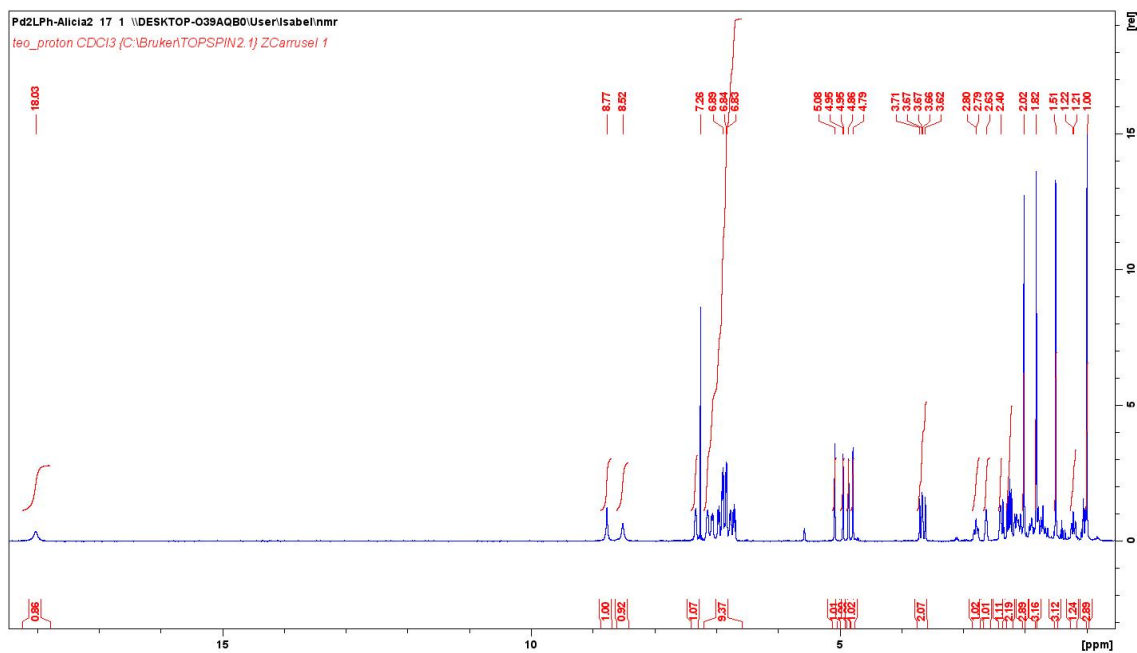

Figure S24. <sup>1</sup>H NMR spectrum of **2a'** in CDCl<sub>3</sub>.

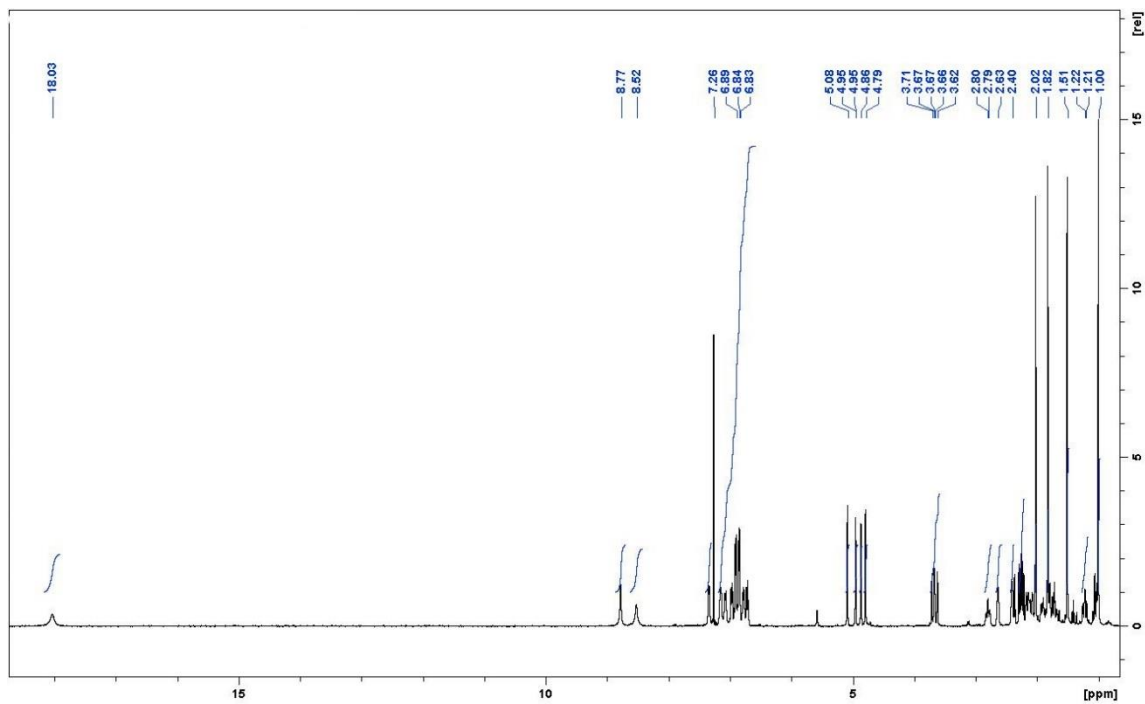

Figure S25.  $^{13}\text{C}$  APT NMR spectrum of **2a** in  $\text{CDCl}_3$ .

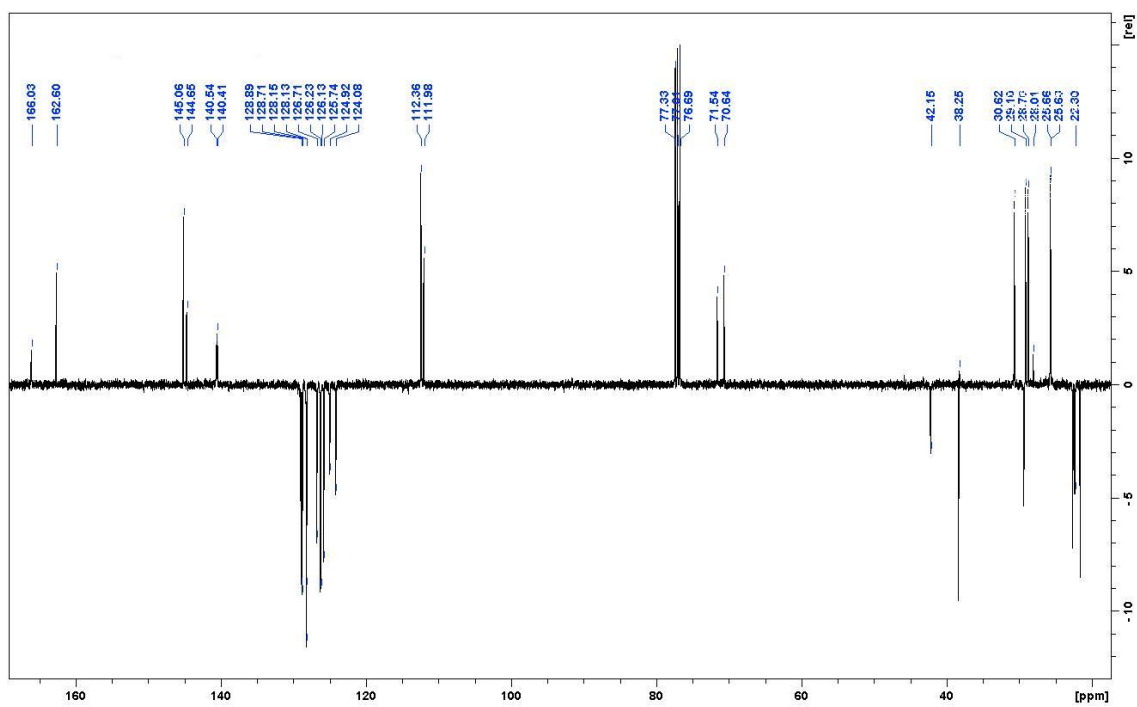

Figure S26.  $^{13}\text{C}$ - $^1\text{H}$  HSQC NMR spectrum of **2a** in  $\text{CDCl}_3$ .

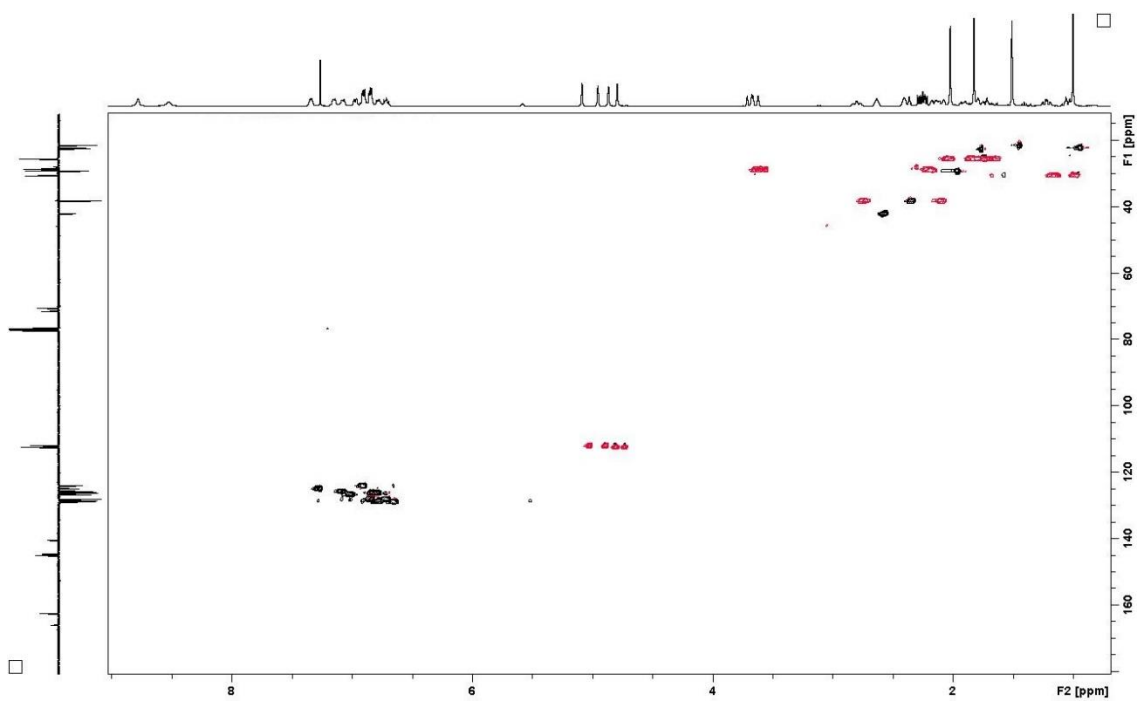

**Figure S27.**  $^{15}\text{N}$ - $^1\text{H}$  HMBC NMR spectrum of **2a** in  $\text{CDCl}_3$ .

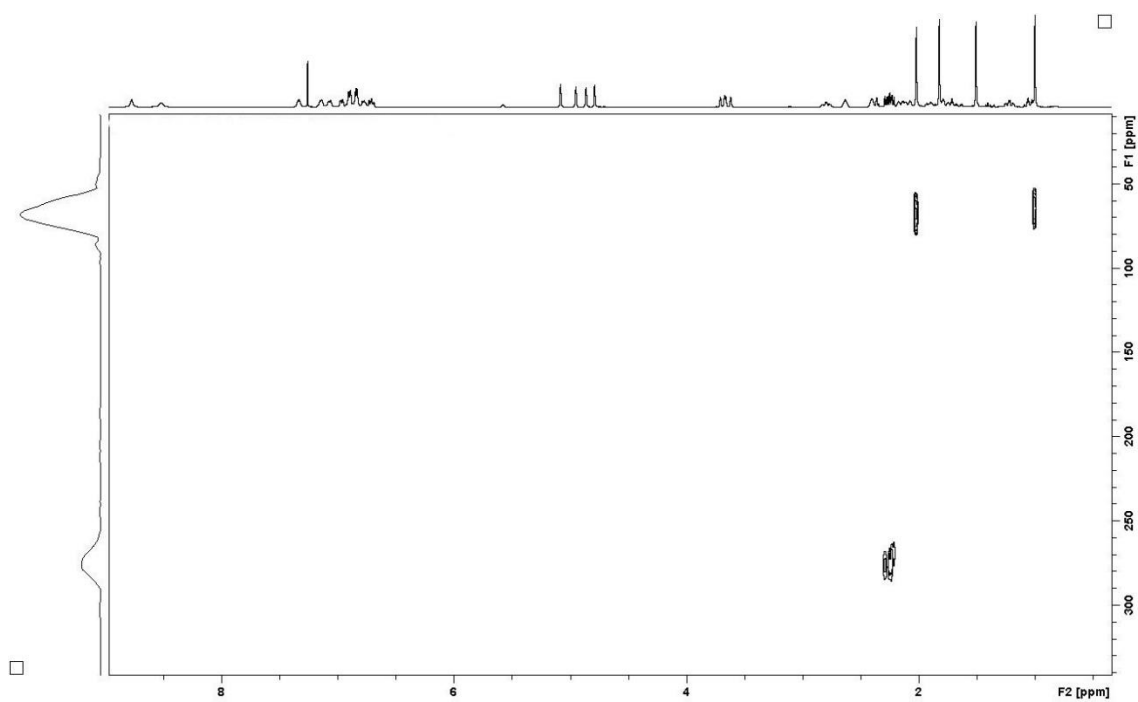

**Figure S28.**  $^1\text{H}$ - $^1\text{H}$  COSY NMR spectrum of **2a** in  $\text{CDCl}_3$ .

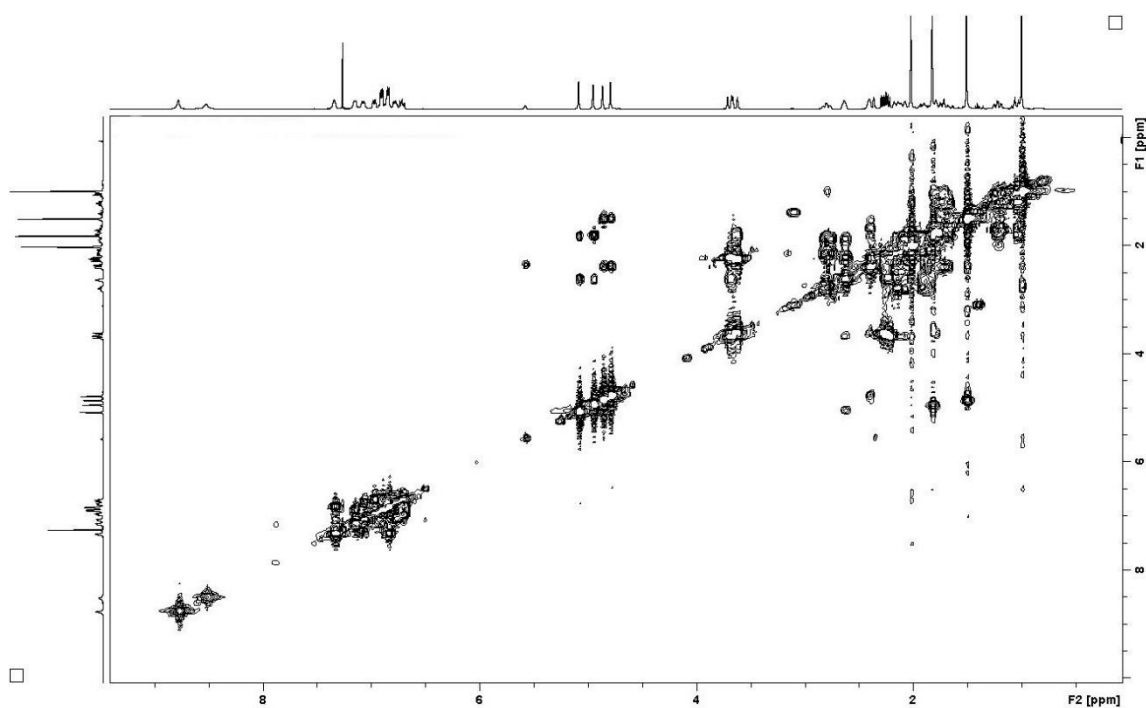

Figure S29. 2D NOESY NMR spectrum of **2a** in CDCl<sub>3</sub>

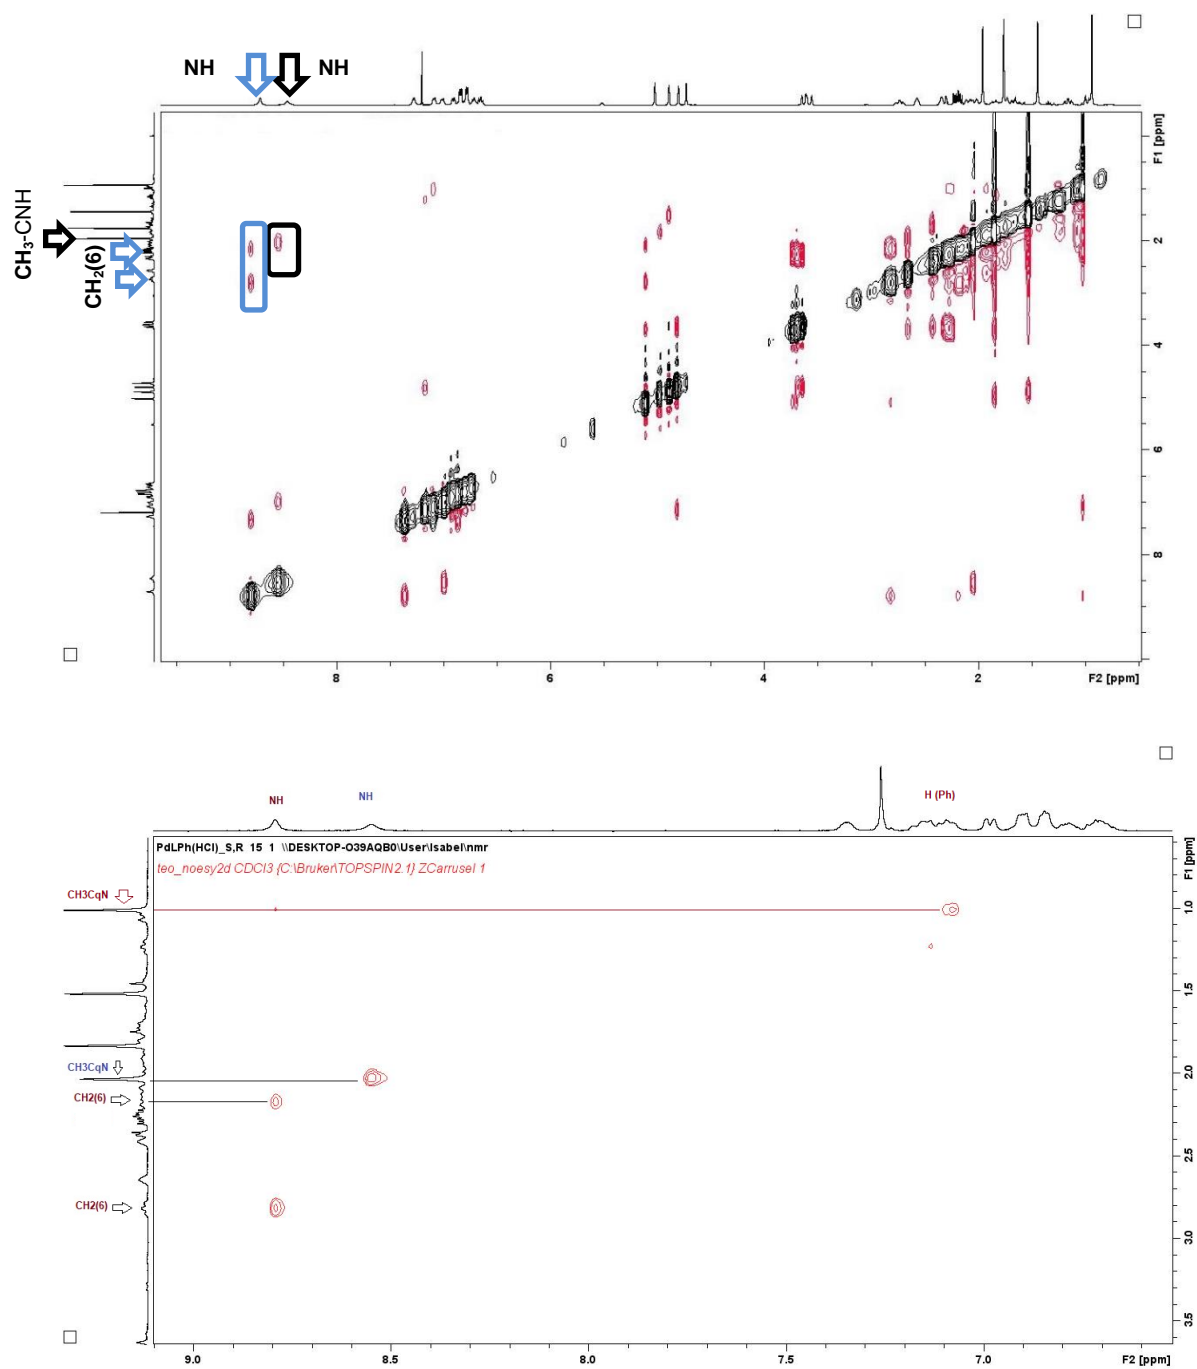

**Figure S30.**  $^1\text{H}$  NMR spectrum of **2b-1** (major) + **2b-2** (minor) in  $\text{CDCl}_3$ .

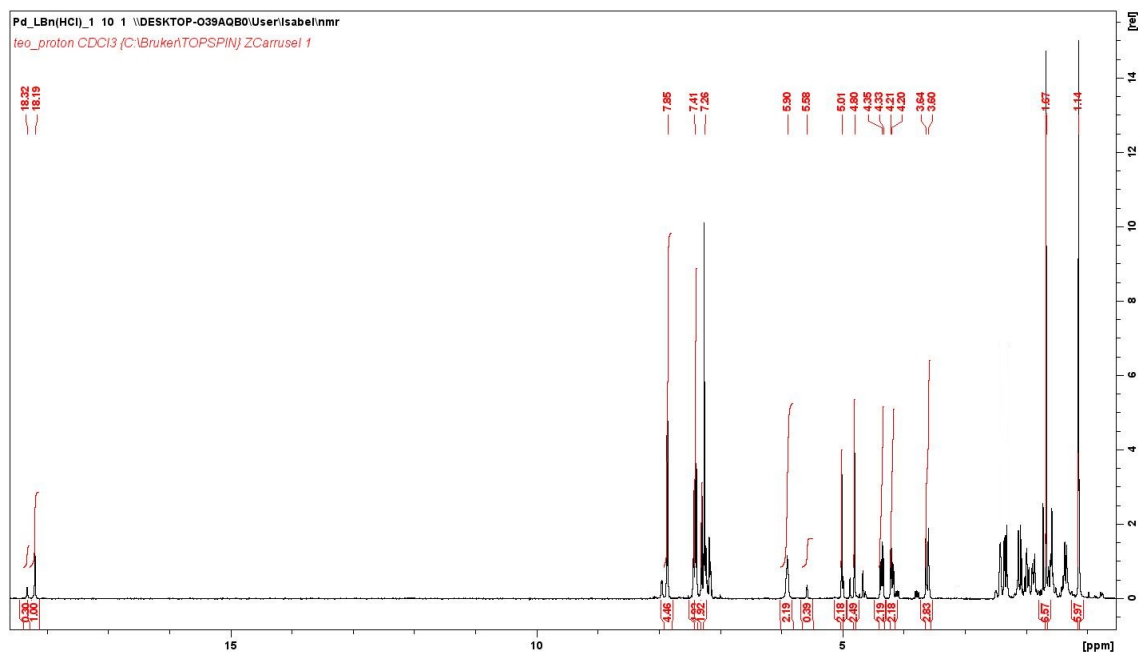

**Figure S31.**  $^1\text{H}$  NMR spectrum of **2b'-1** (major) + **2b'-2** (minor) in  $\text{CDCl}_3$ .

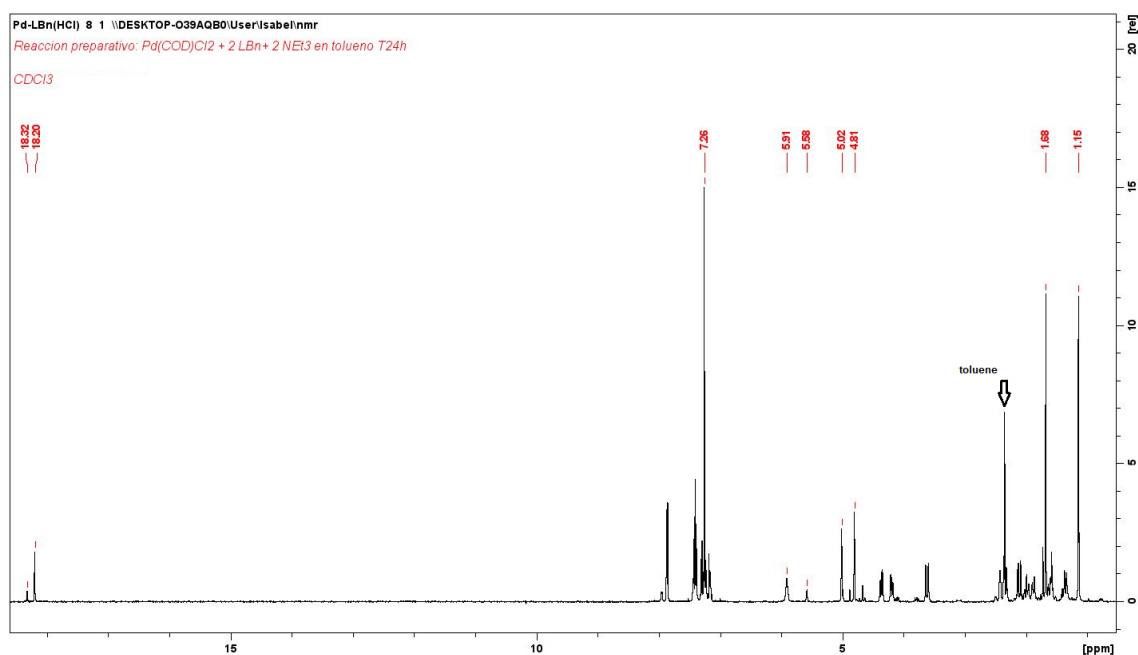

**Figure S32.**  $^{13}\text{C}$  APT NMR spectrum of **2b-1** (major) + **2b-2** (minor) in  $\text{CDCl}_3$  (full and expanded)

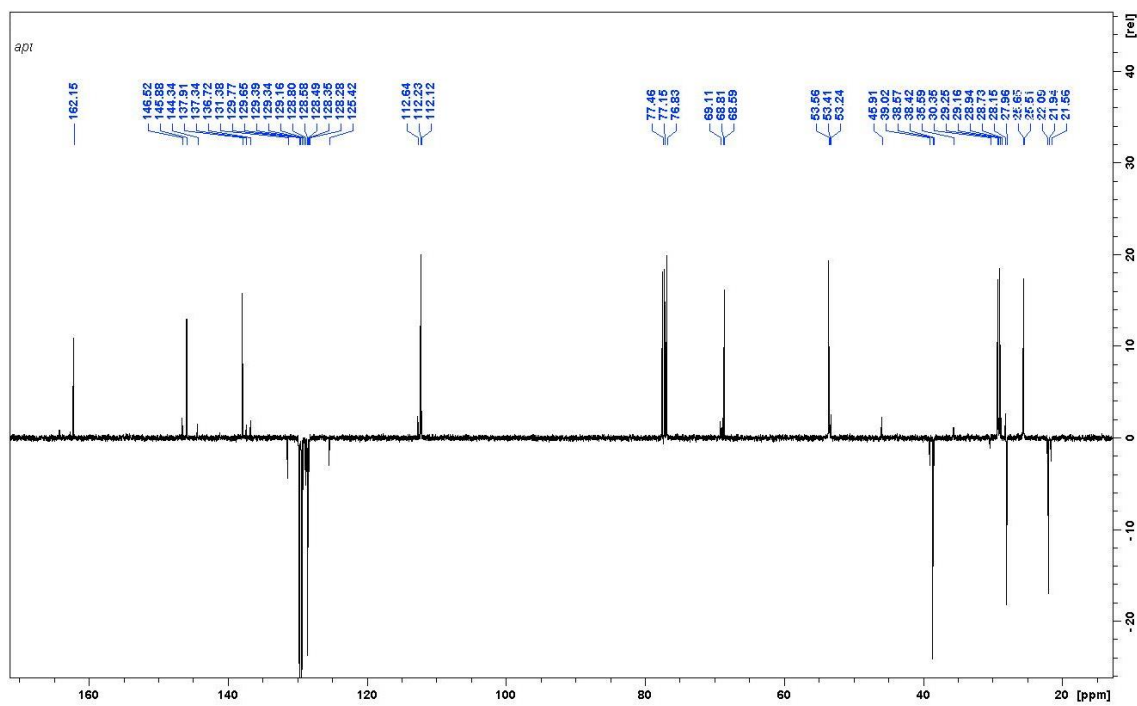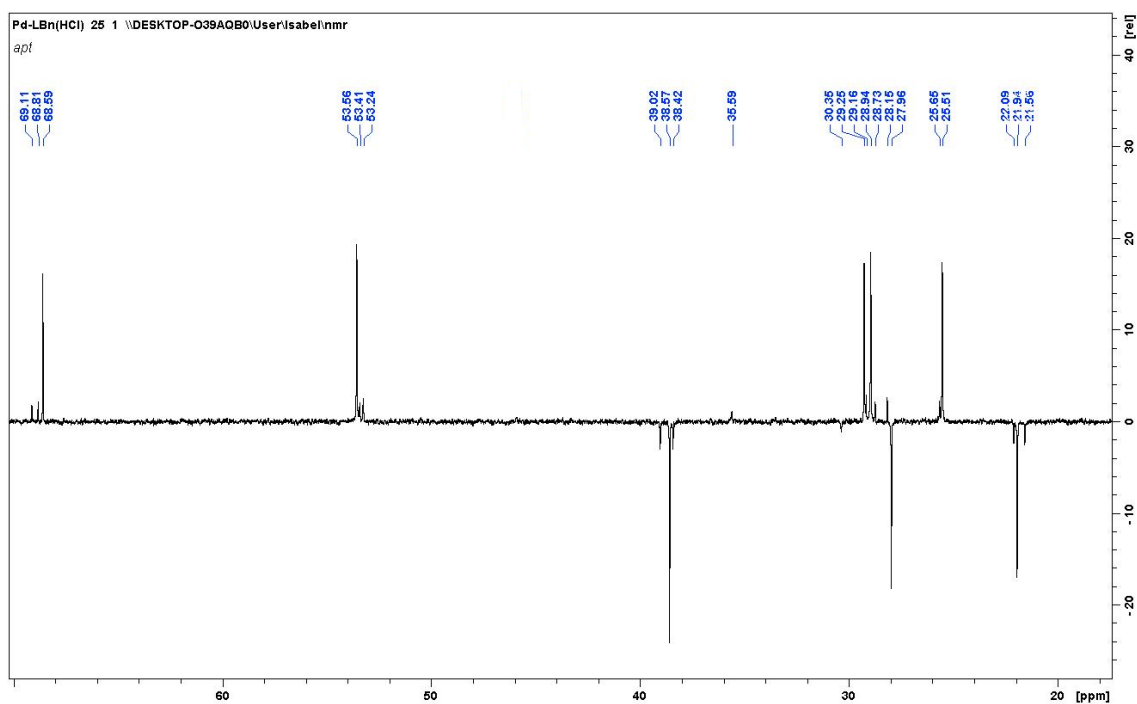



**Figure S33.**  $^1\text{H}$   $^{13}\text{C}$  HSQC NMR spectrum of **2b-1** (major) + **2b-2** (minor) in  $\text{CDCl}_3$  (full and expanded)

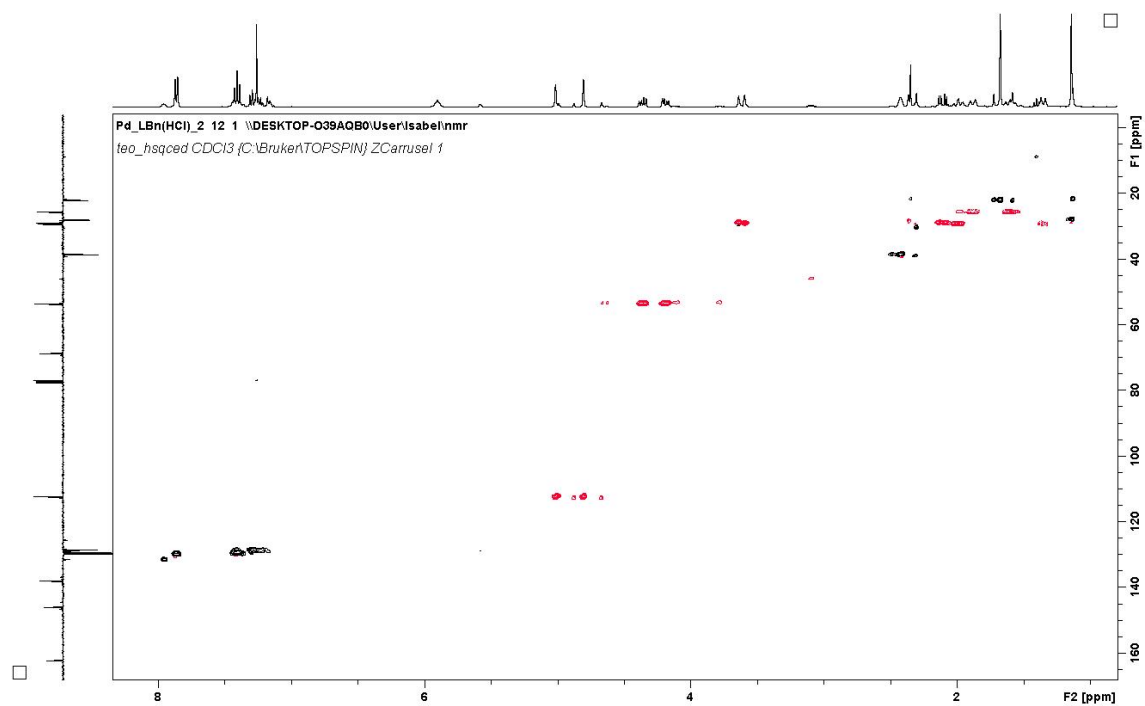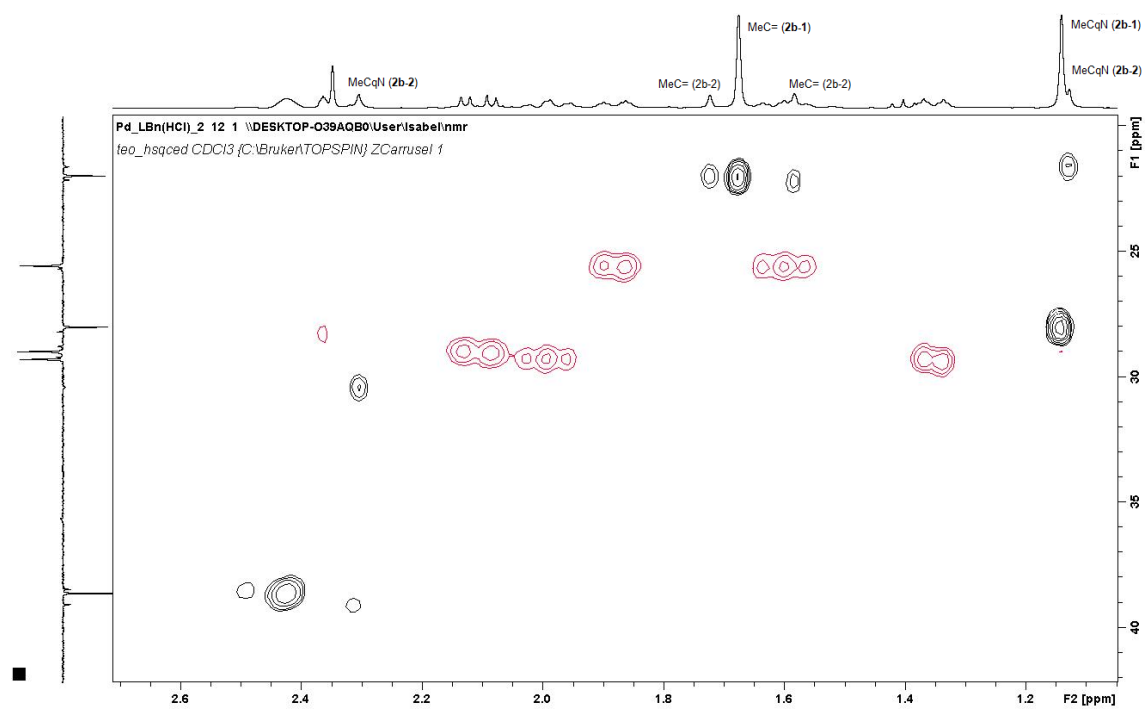

**Figure S34.**  $^{13}\text{C}$ - $^1\text{H}$  HMBC NMR spectrum of **2b-1** (major) + **2b-2** (minor) in  $\text{CDCl}_3$ .

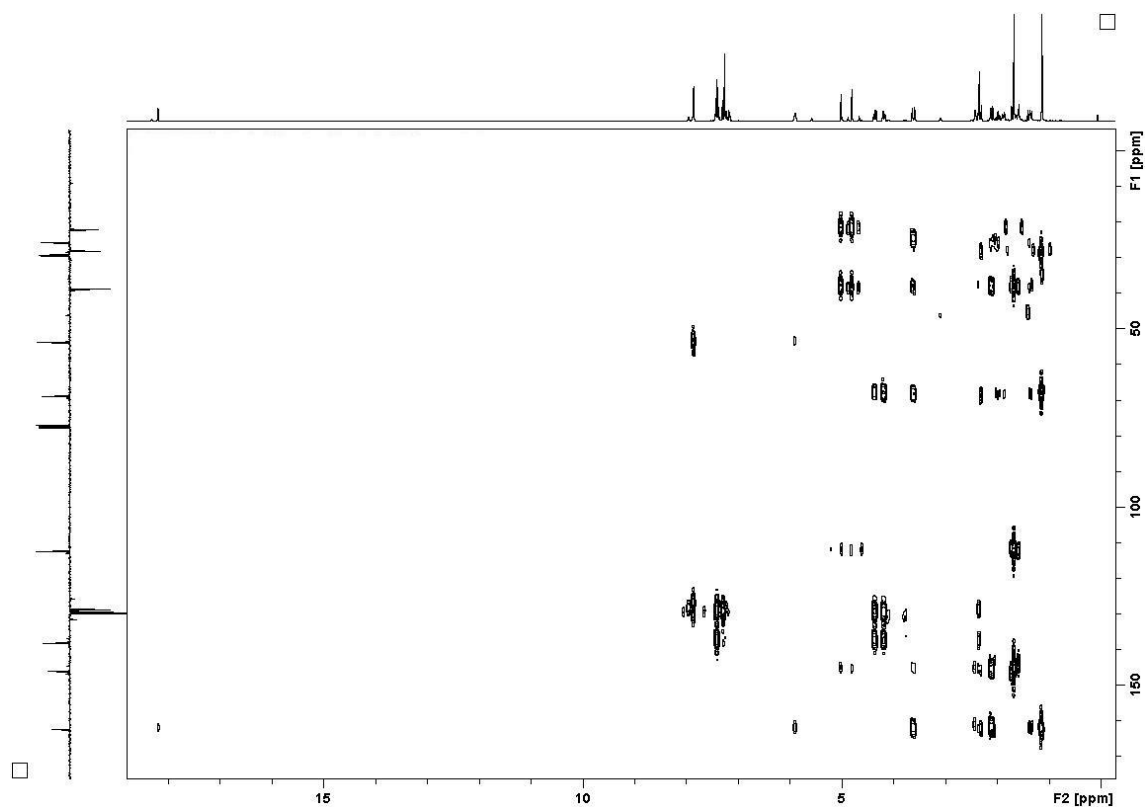

**Figure S35.**  $^{15}\text{N}$ - $^1\text{H}$  HMBC NMR spectrum of **2b-1** (major) + **2b-2** (minor) in  $\text{CDCl}_3$  (full and expanded)

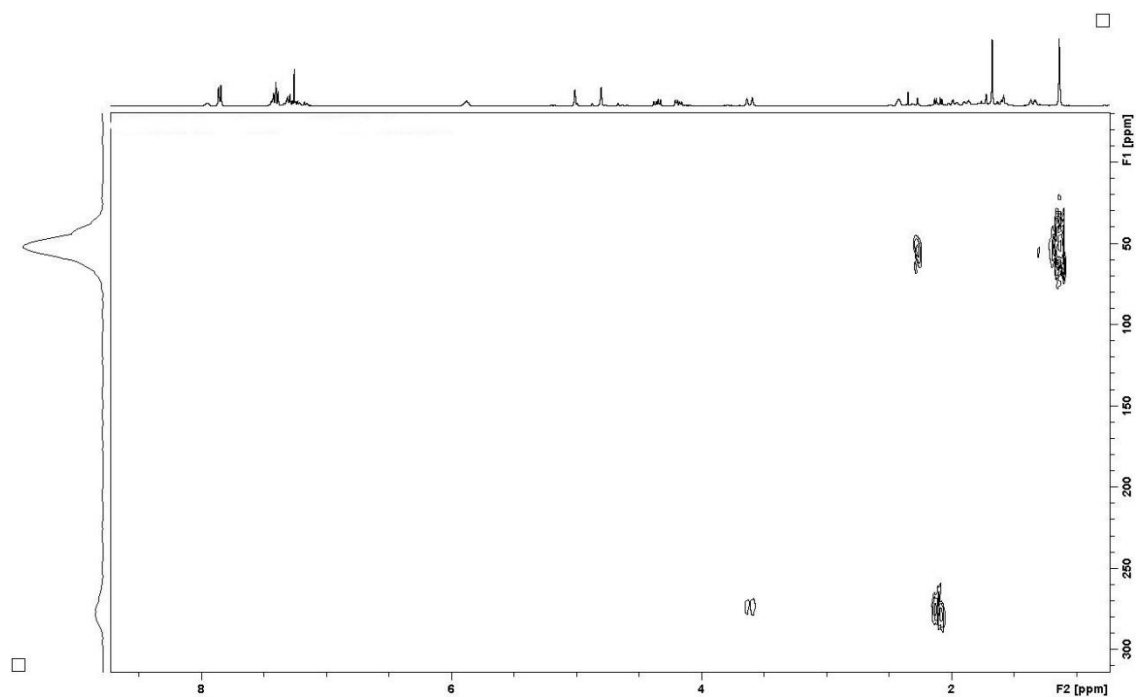

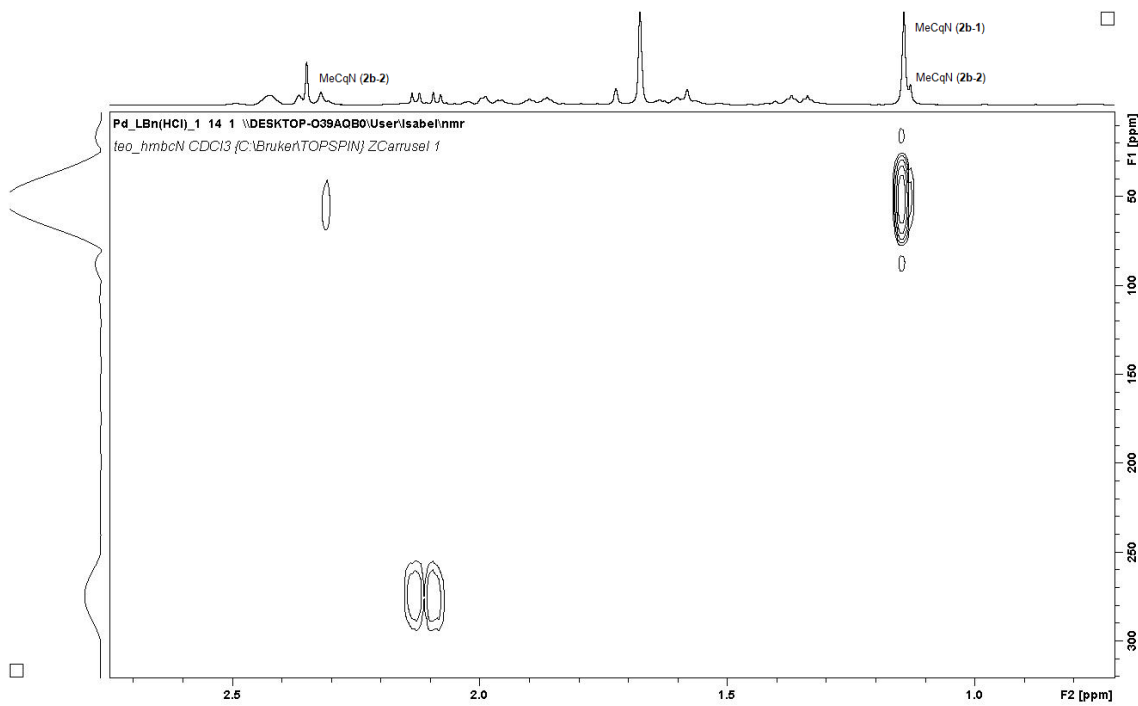

Figure S36.  $^1\text{H}$ - $^1\text{H}$  COSY NMR spectrum of **2b-1** (major) + **2b-2** (minor) in  $\text{CDCl}_3$ .

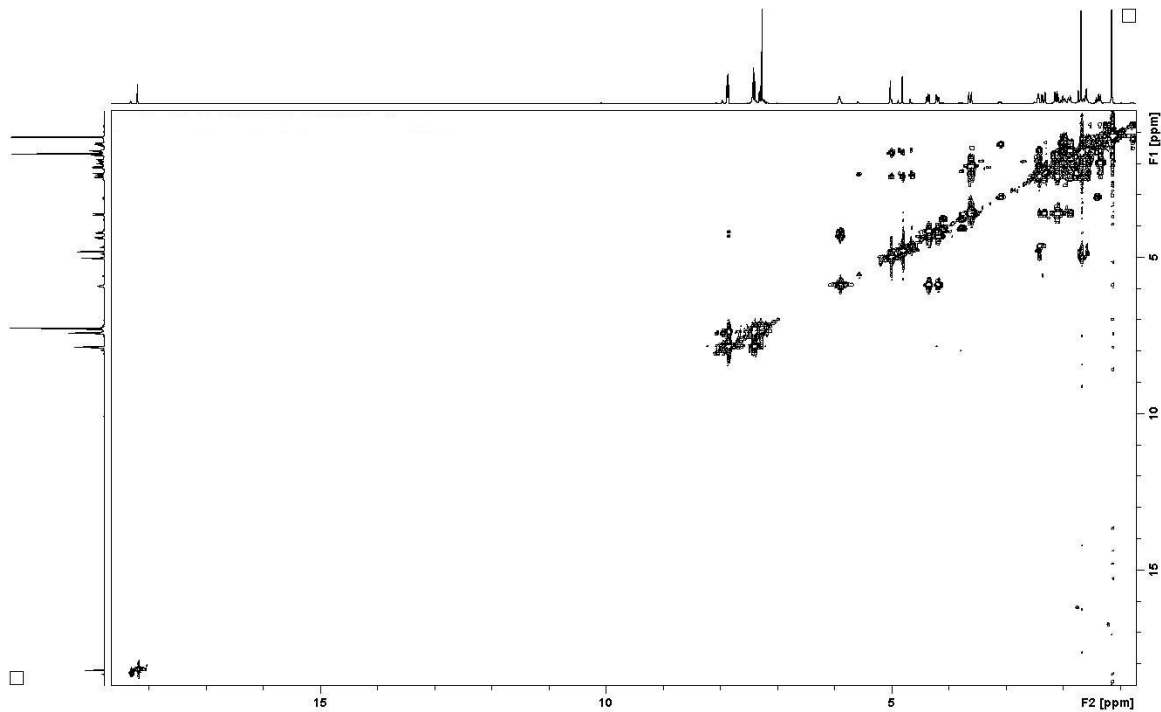

Figure S37. 2D NOESY NMR spectrum of **2b-1** (major) + **2b-2** (minor) in CDCl<sub>3</sub>.

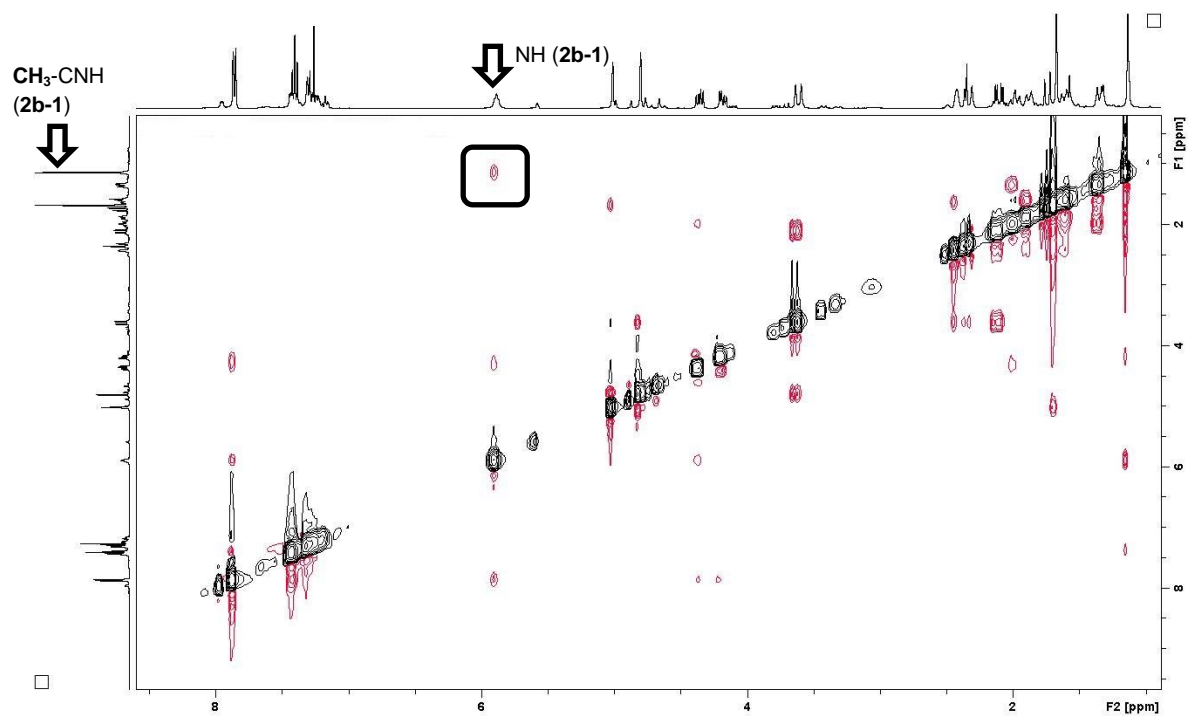

**Figure S38.** Time-dependent  $^1\text{H}$  NMR spectra of **2b-1** (minor) + **2b-2** (major) (5 mM) in water- $d_2$  ( $\text{pH}^* = 7.3$ ).

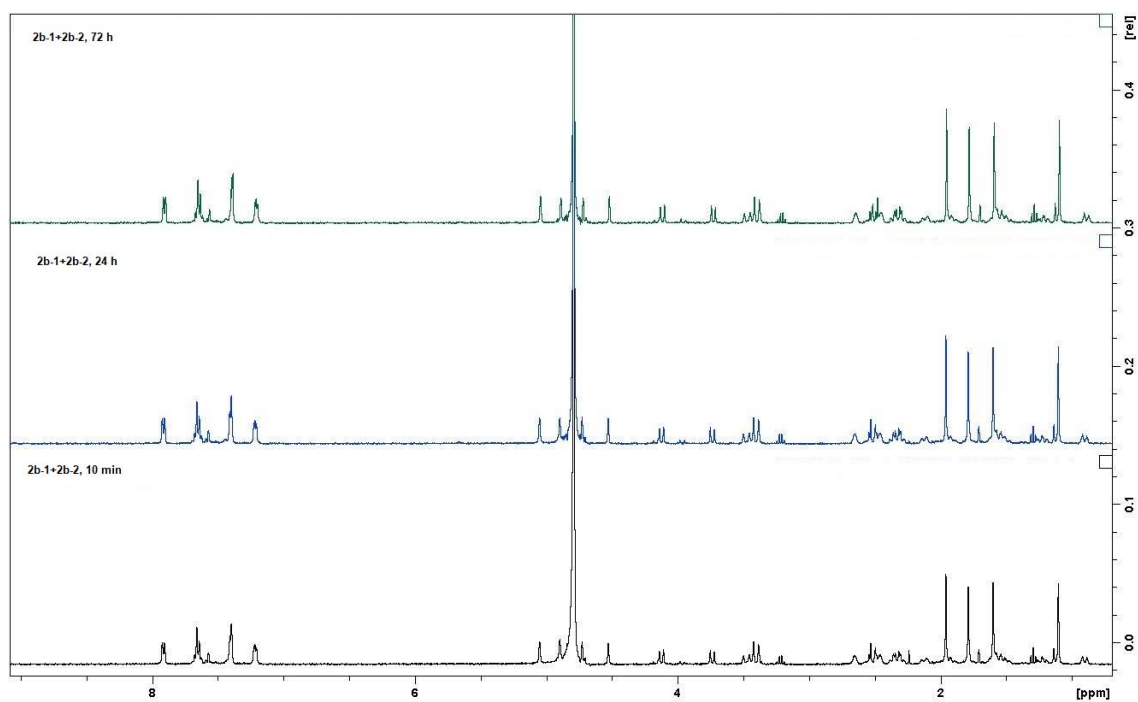

Figure S39.  $^1\text{H}$  NMR spectrum of **2b-1** (minor) + **2b-2** (major) in water- $d_2$ .

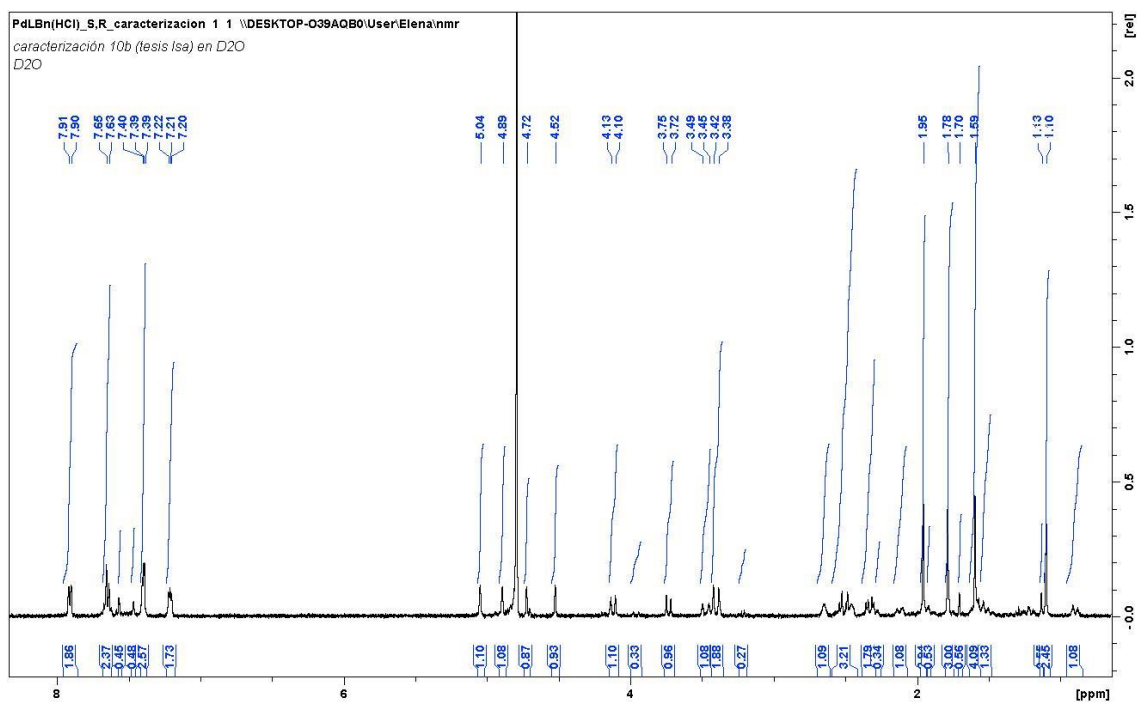

Figure S40.  $^1\text{H}$  NMR spectrum of **2b-1** (minor) + **2b-2** (major) in methanol- $d_4$ .

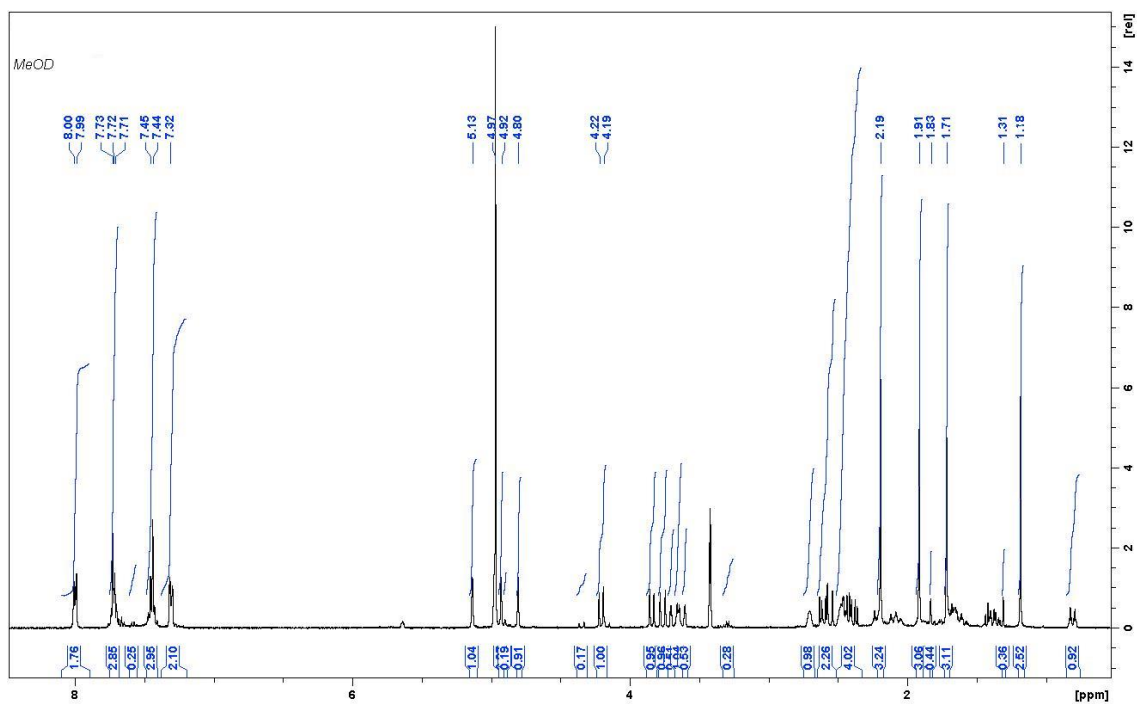

**Figure S41.**  $^{13}\text{C}$  APT NMR spectrum of **2b-1** (*minor*) + **2b-2** (*major*) in water- $d_2$ .

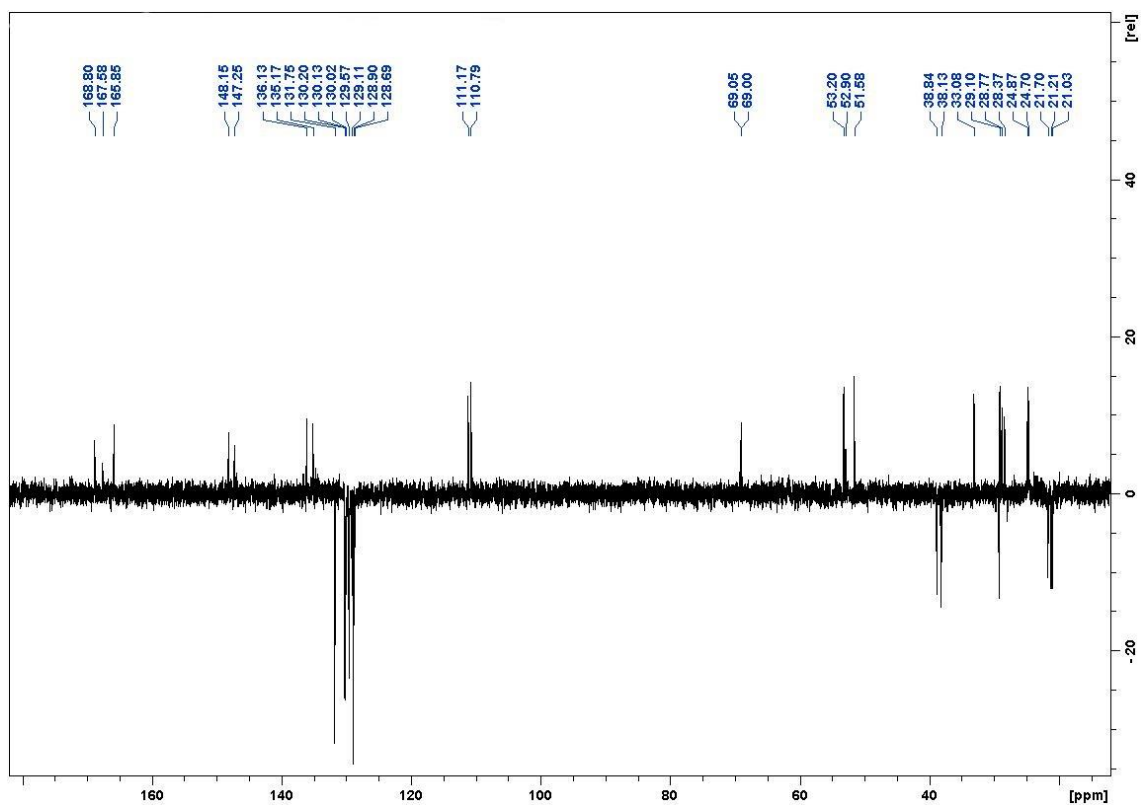

**Figure S42.**  $^{13}\text{C}$ - $^1\text{H}$  HSQC NMR spectrum of **2b-1** (*minor*) + **2b-2** (*major*) in water- $d_2$  (full and expanded)

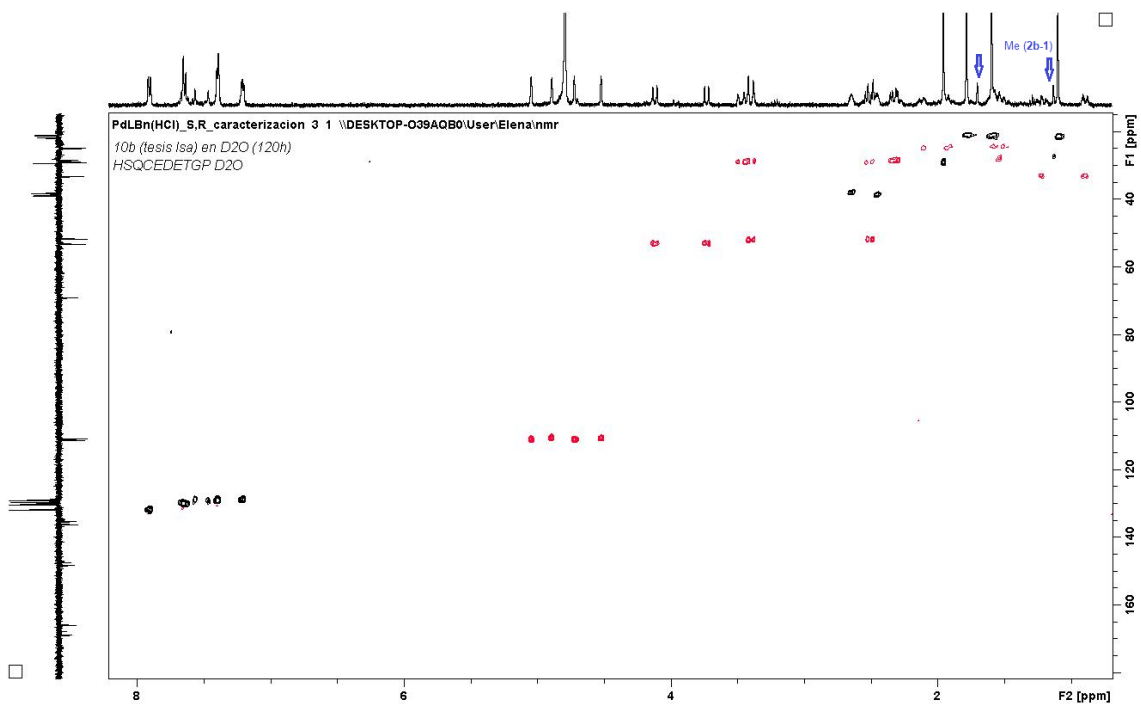

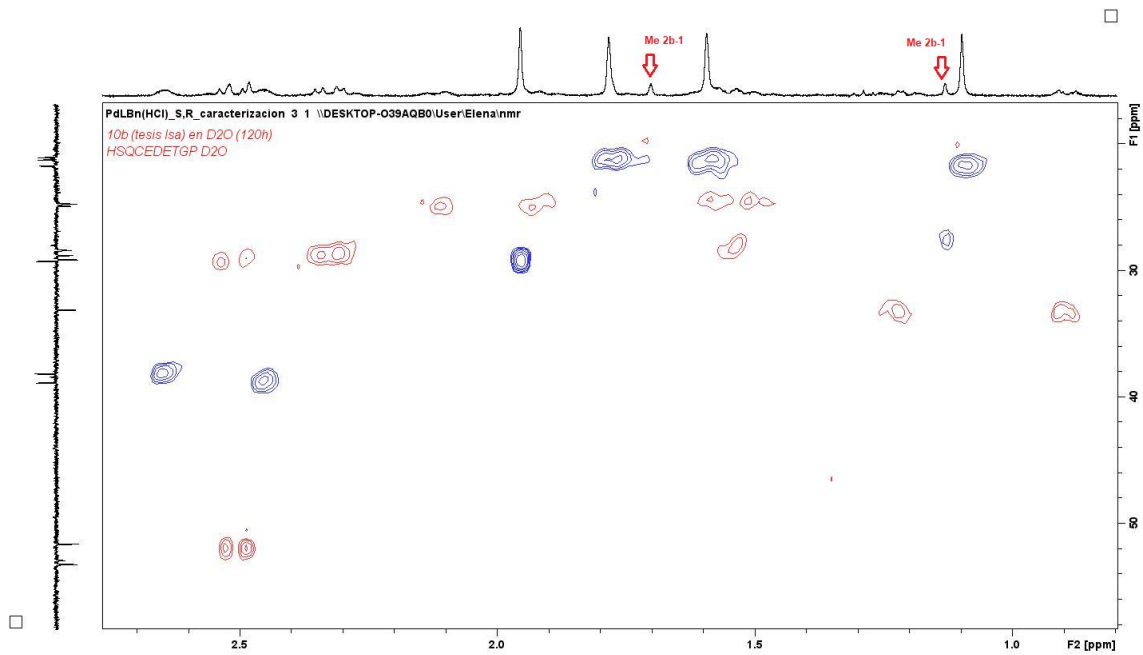

Figure S43.  $^{15}\text{N}$ - $^1\text{H}$  HMBC NMR spectrum of **2b-1** (*minor*) + **2b-2** (*major*) in water- $d_2$ .

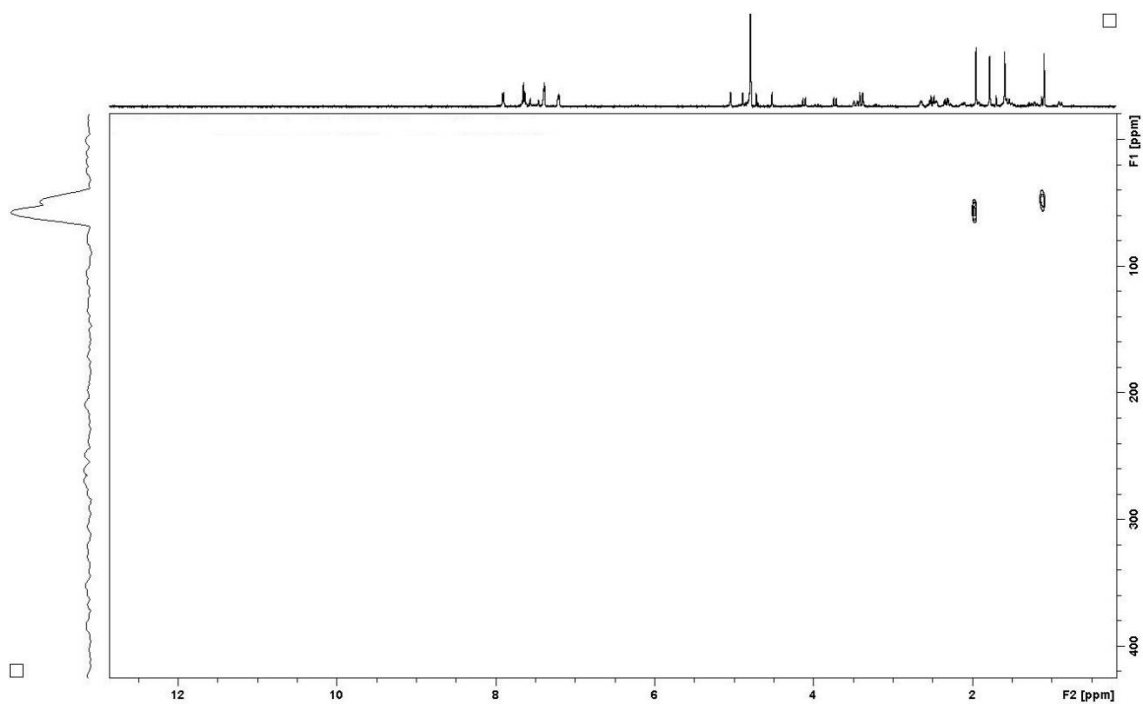



**Figure S44.**  $^{13}\text{C}$  APT NMR spectrum of **2b-1** (minor) + **2b-2** (major) in methanol- $d_4$

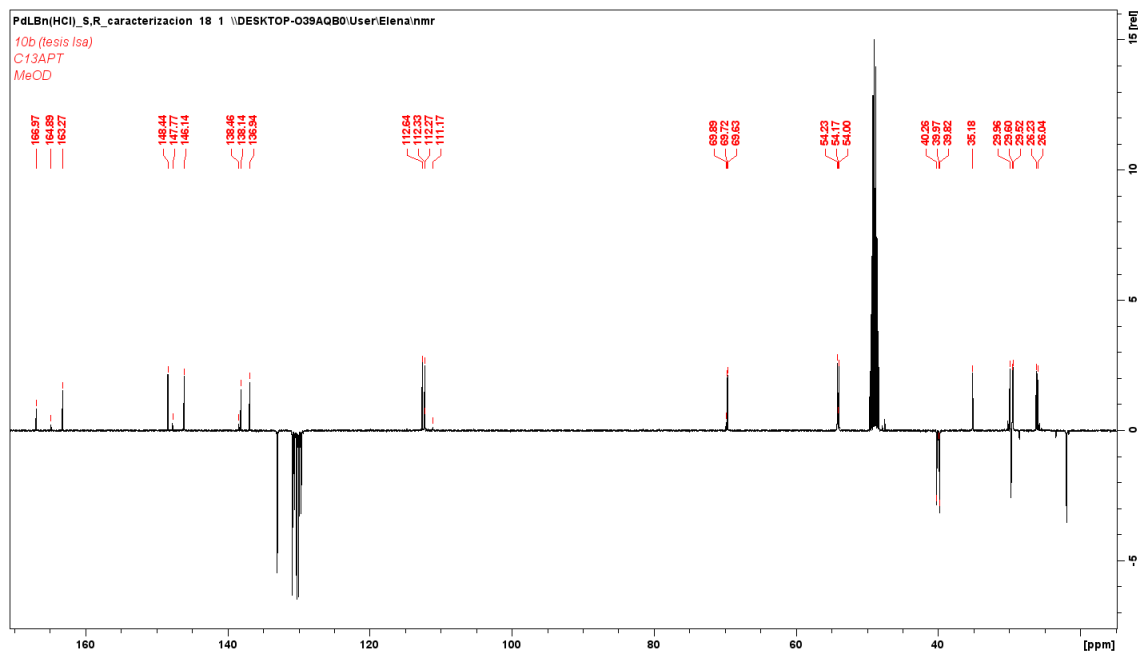

**Figure S45.**  $^1\text{H}$ - $^{13}\text{C}$  HSQC NMR spectrum of **2b-1** (minor) + **2b-2** (major) in methanol- $d_4$ . Full and expanded

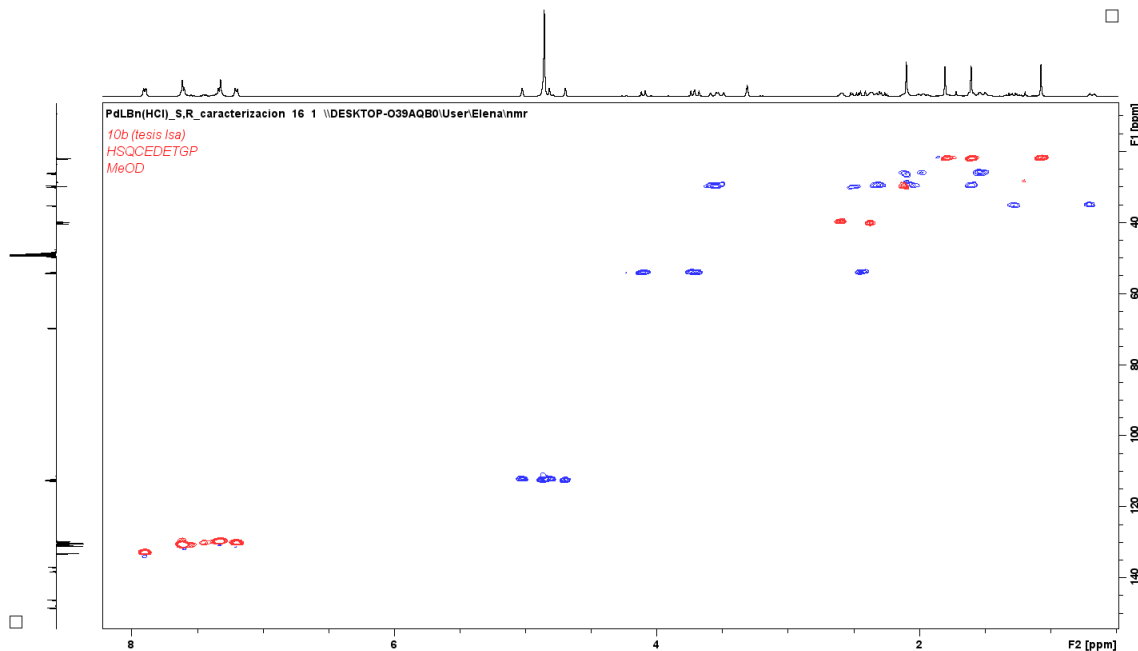

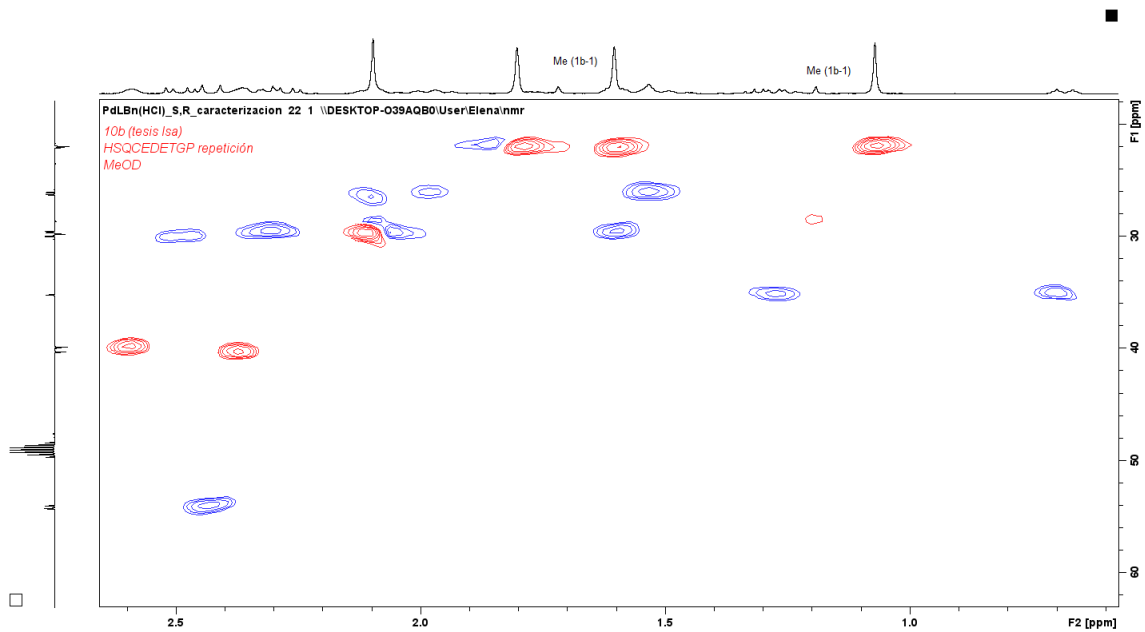

Figure S46.  $^1\text{H}$ - $^{15}\text{N}$  HMBC NMR spectrum of **2b-1** (minor) + **2b-2** (major) in methanol- $d_4$ .

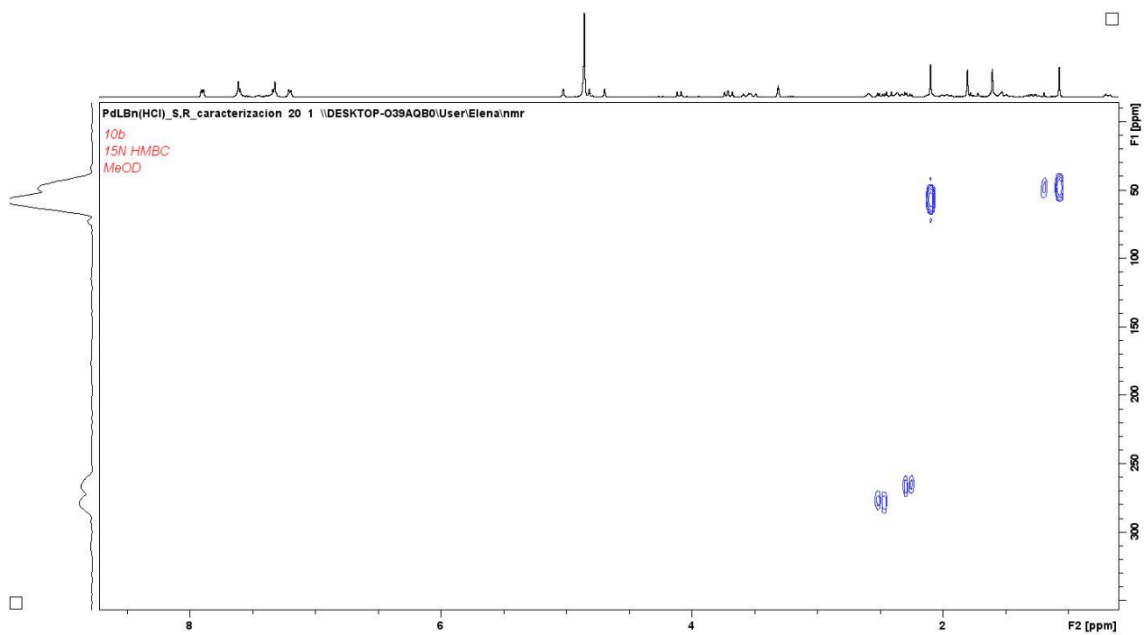

**Figure S47.** Time dependent UV-vis spectra in water of **1a** and comparison with UV-vis spectrum in water of **a·HCl**.

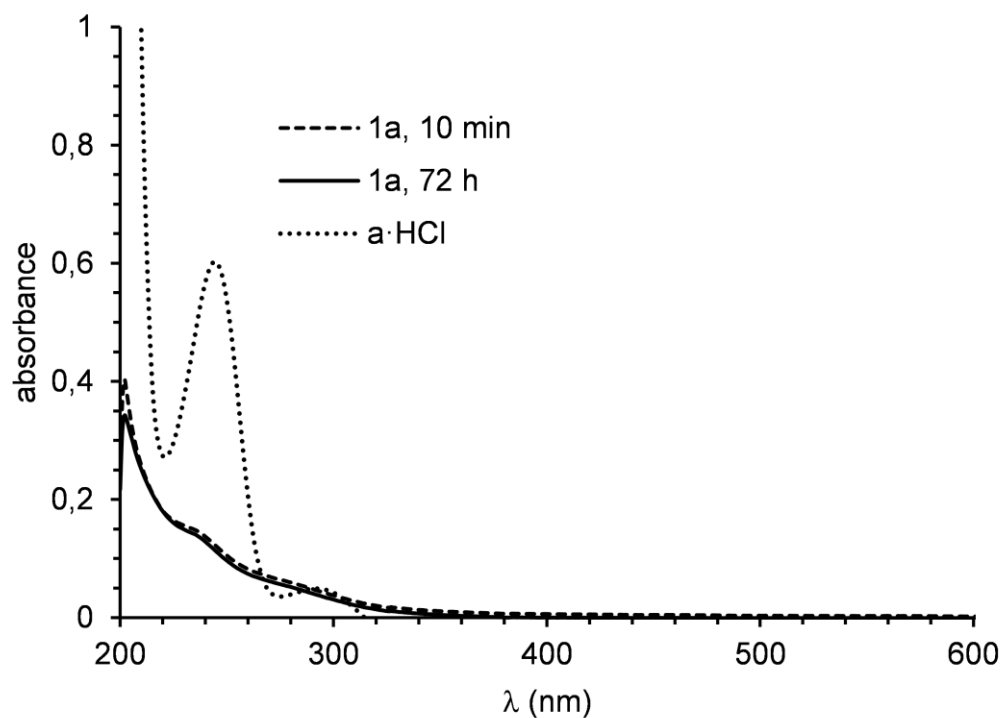

**Figure S48.** Time dependent UV-vis spectra in water of **1b** and comparison with UV-Vis spectrum in water of **b·HCl**.

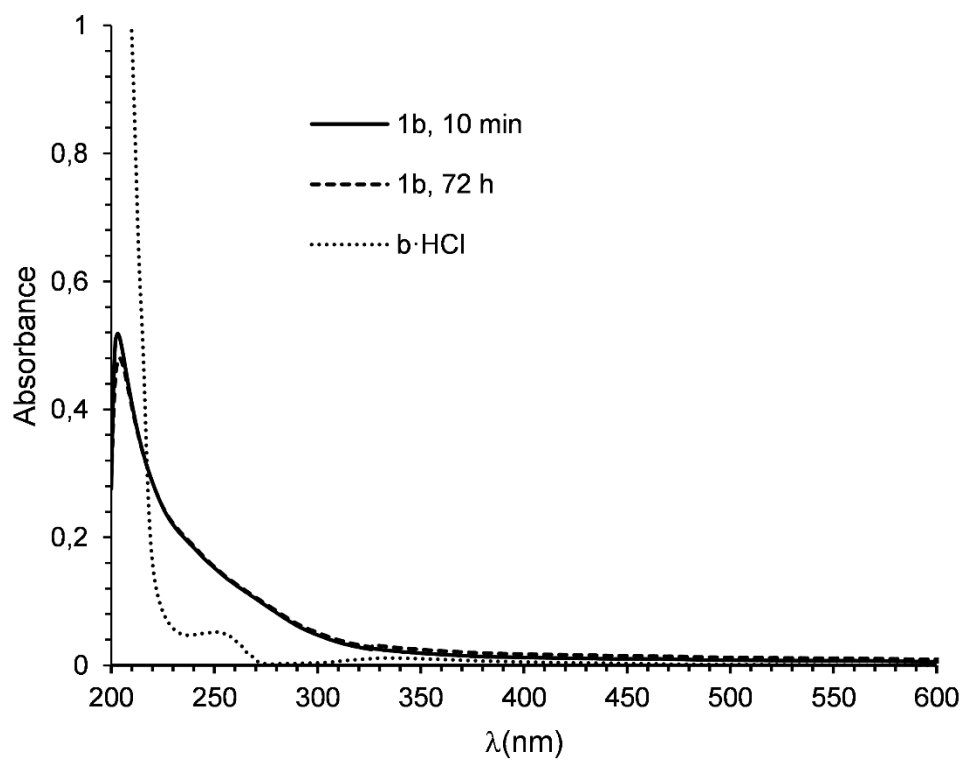

**Figure S49.** Time dependent UV-vis spectra in water of **2a**.

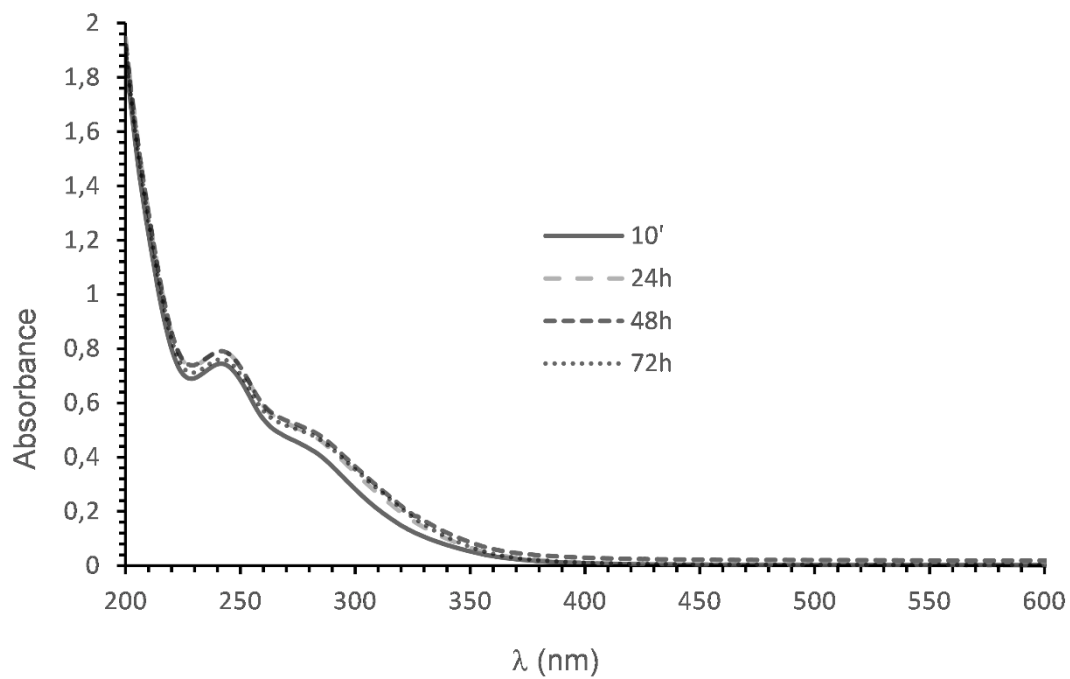

**Figure S50.** Time dependent UV-vis spectra in water of **2b**.

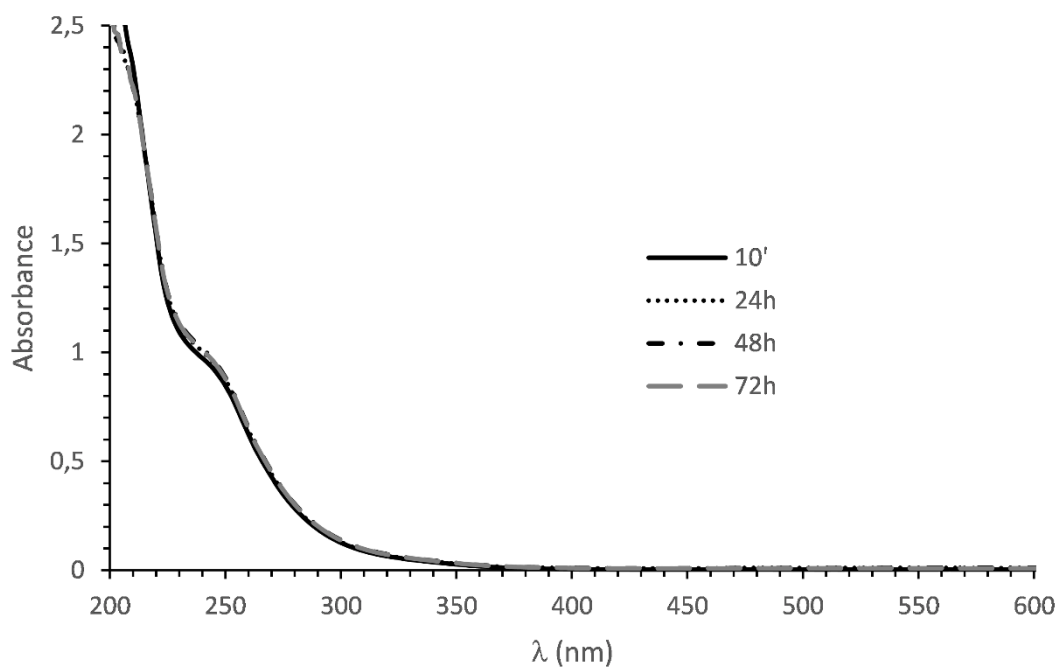

**Figure S51.** HR-ESI MS in water of **2a**, full spectra, expanded and simulated peak for  $(C_{32}H_{43}N_4O_2Pd)$ ,  $[M-C]^{+}$ .

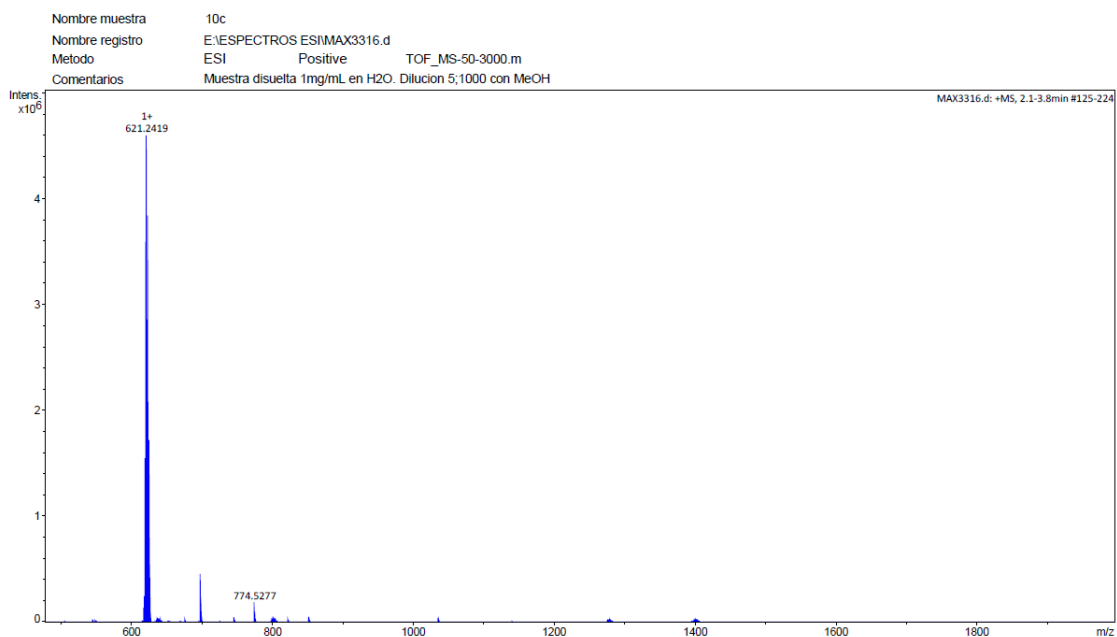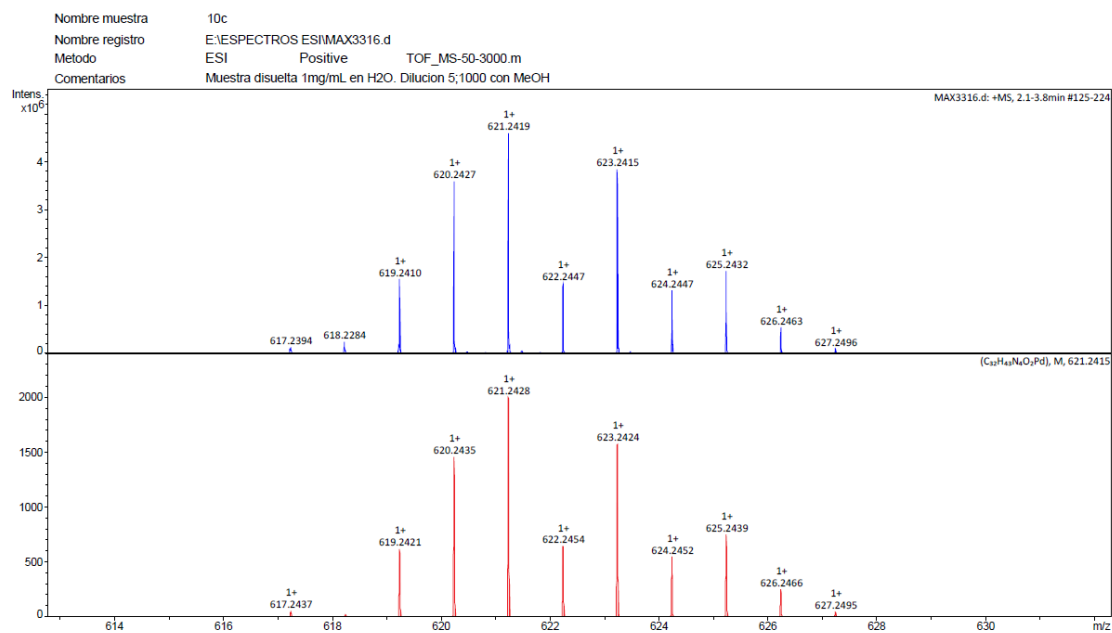

**10c**

| MASA TEORICA | MASA EXPERIMENTAL | ERROR (ppm) | ERROR (amu) |
|--------------|-------------------|-------------|-------------|
| 619.241      | 619.2421          | -1.7764     | 0.0011      |
| 620.2427     | 620.2435          | -1.2898     | 0.0008      |
| 621.2419     | 621.2428          | -1.4487     | 0.0009      |
| 622.2447     | 622.2454          | -1.1250     | 0.0007      |
| 623.2415     | 623.2424          | -1.4441     | 0.0009      |
| 624.2447     | 624.2452          | -0.8010     | 0.0005      |
| 625.2432     | 625.2439          | -1.1196     | 0.0007      |
| 626.2463     | 626.2466          | -0.4790     | 0.0003      |

**Figure S52.** HR-ESI MS in water of **2a'**, full spectra, expanded and simulated peak for  $(C_{32}H_{43}N_4O_2Pd)$ ,  $[M-C]^+$ .

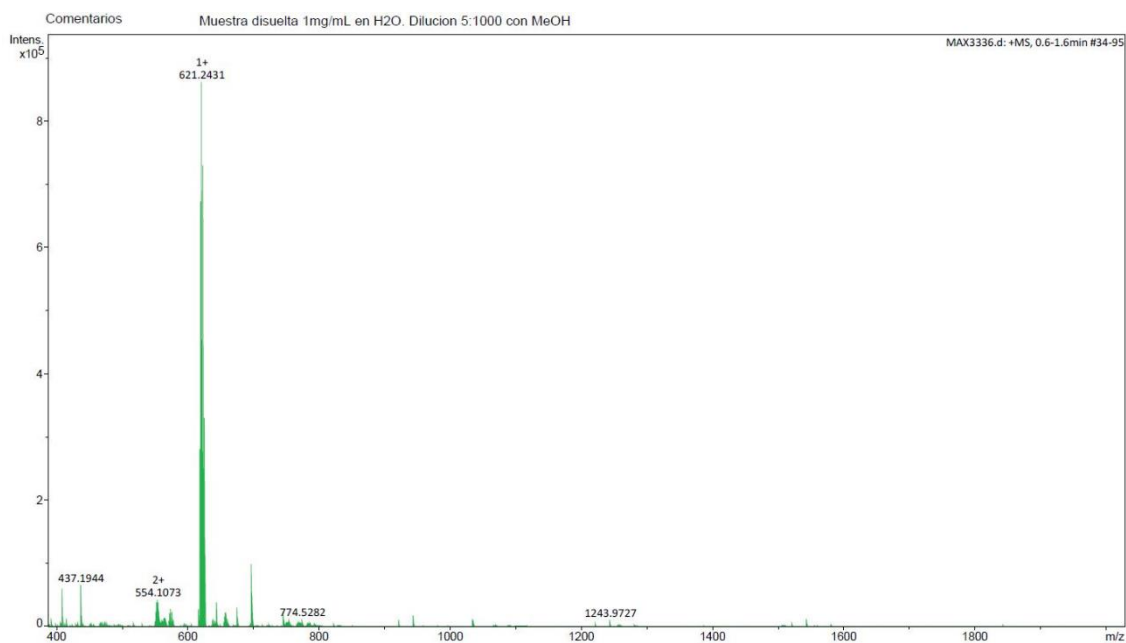

Nombre muestra 10c'  
 Nombre registro D:\Data\2020\2020\_11 NOVIEMBRE\MAX3336.d  
 Metodo ESI Positive TOF\_MS-50-3000.m  
 Comentarios Muestra disuelta 1mg/mL en H2O. Dilucion 5:1000 con MeOH

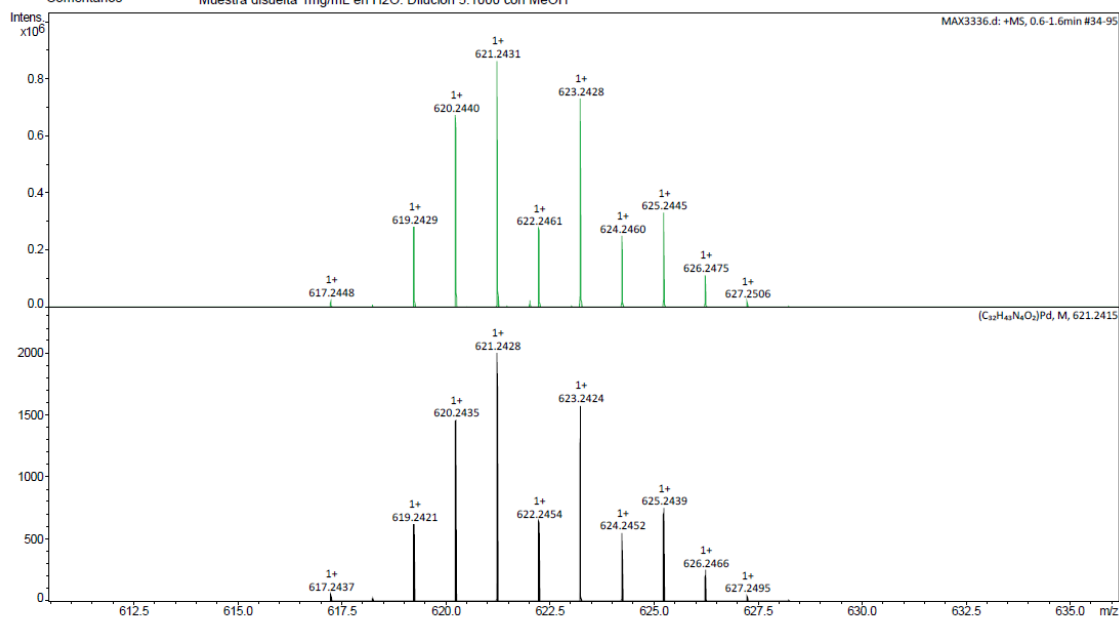

| 10c'         |                   |             |             |  |
|--------------|-------------------|-------------|-------------|--|
| MASA TEORICA | MASA EXPERIMENTAL | ERROR (ppm) | ERROR (amu) |  |
| 617.2437     | 617.2448          | -1.7821     | 0.0011      |  |
| 618.2468     | 618.2478          | -1.6175     | 0.001       |  |
| 619.2421     | 619.2429          | -1.2919     | 0.0008      |  |
| 620.2435     | 620.244           | -0.8061     | 0.0005      |  |
| 621.2428     | 621.2431          | -0.4829     | 0.0003      |  |
| 622.2454     | 622.2461          | -1.1250     | 0.0007      |  |
| 623.2424     | 623.2428          | -0.6418     | 0.0004      |  |
| 624.2452     | 624.246           | -1.2815     | 0.0008      |  |
| 625.2439     | 625.2445          | -0.9596     | 0.0006      |  |
| 626.2466     | 626.2475          | -1.4371     | 0.0009      |  |

**Figure S53.** HR-ESI MS in water of **2b**, full spectra, theoretical and experimental mass for (C<sub>34</sub>H<sub>47</sub>N<sub>4</sub>O<sub>2</sub>Pd), [M-Cl]<sup>+</sup>.

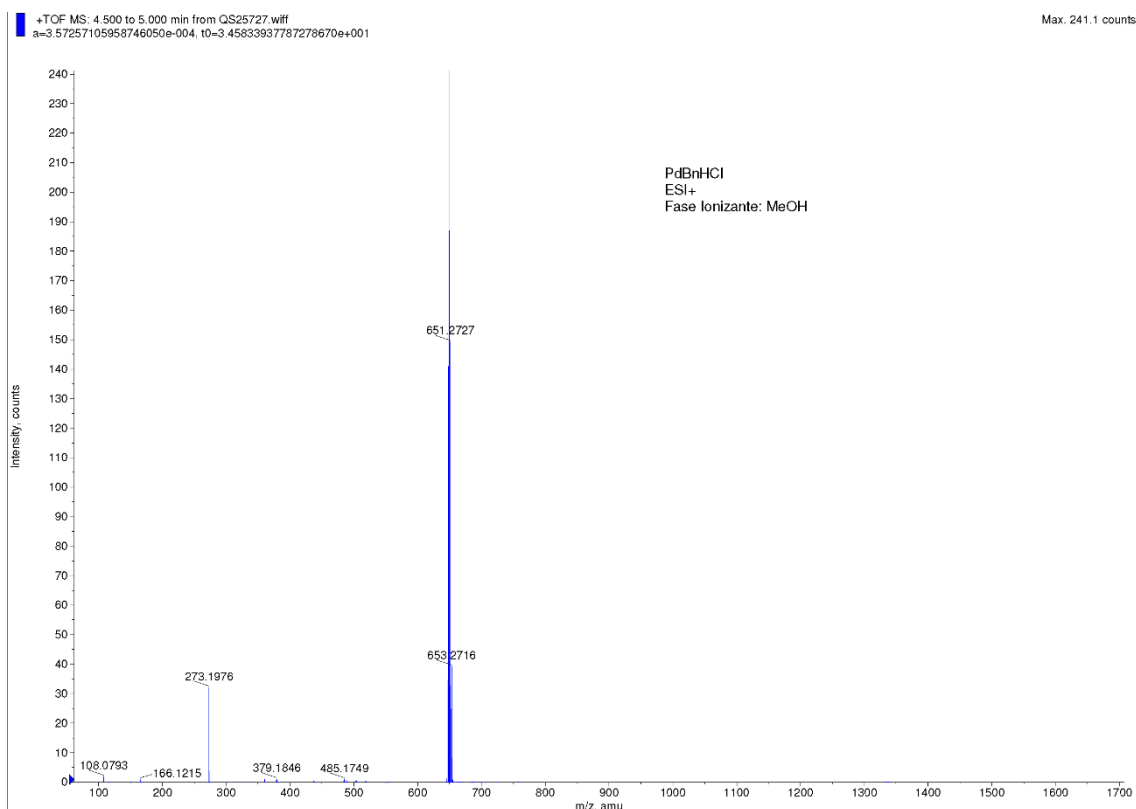

| PdBnHCl      |                   |             |             |  |
|--------------|-------------------|-------------|-------------|--|
| MASA TEORICA | MASA EXPERIMENTAL | ERROR (ppm) | ERROR (amu) |  |
| 647.2734     | 647.2733          | 0.1545      | -0.0001     |  |
| 648.2748     | 648.2756          | -1.2340     | 0.0008      |  |
| 649.2741     | 649.2749          | -1.2321     | 0.0008      |  |
| 650.2767     | 650.275           | 2.6143      | -0.0017     |  |
| 651.2738     | 651.2727          | 1.6890      | -0.0011     |  |
| 652.2766     | 652.272           | 7.0522      | -0.0046     |  |
| 653.2753     | 653.2716          | 5.6638      | -0.0037     |  |

**Figure S54.** FRET DNA melting curves of **2a**, **2a'**, **2b** and **2b'** at 10  $\mu\text{M}$  concentration with ds DNA (F10T, 0.2  $\mu\text{M}$ ).

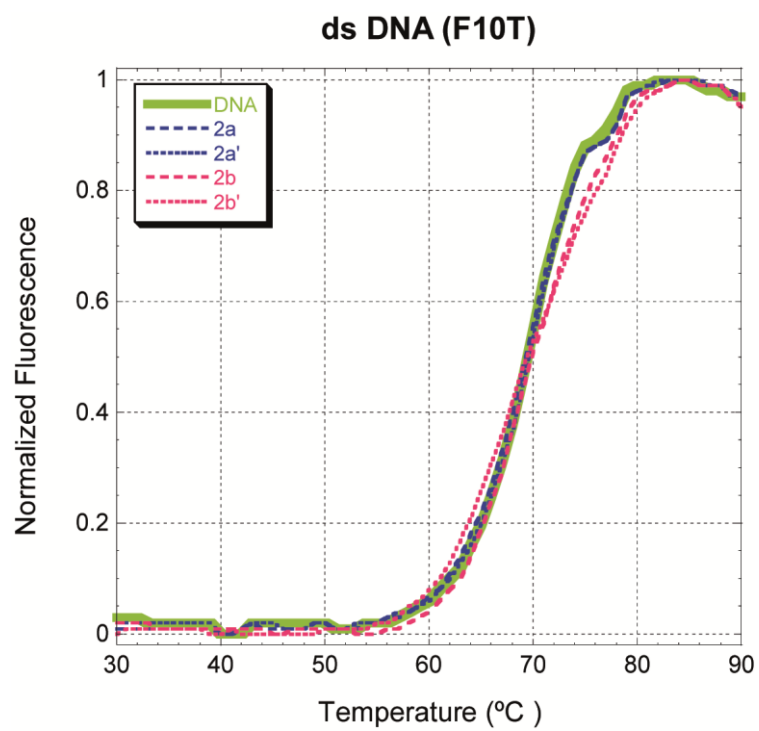



**Figure S55:** Analysis of cell cycle of PC-3 cells after treatment with cisplatin, **2a** and **2a'**. Cells were treated for 48 h with **2a** (0.79  $\mu$ M) or **2a'** (0.17  $\mu$ M). The results are shown as percentage of cells in each phase of the cycle as compared to untreated control cells. Data in the table are the means  $\pm$  SEM of four independent experiments; \*p < 0.05; \*\*\*p < 0.001 vs. control.

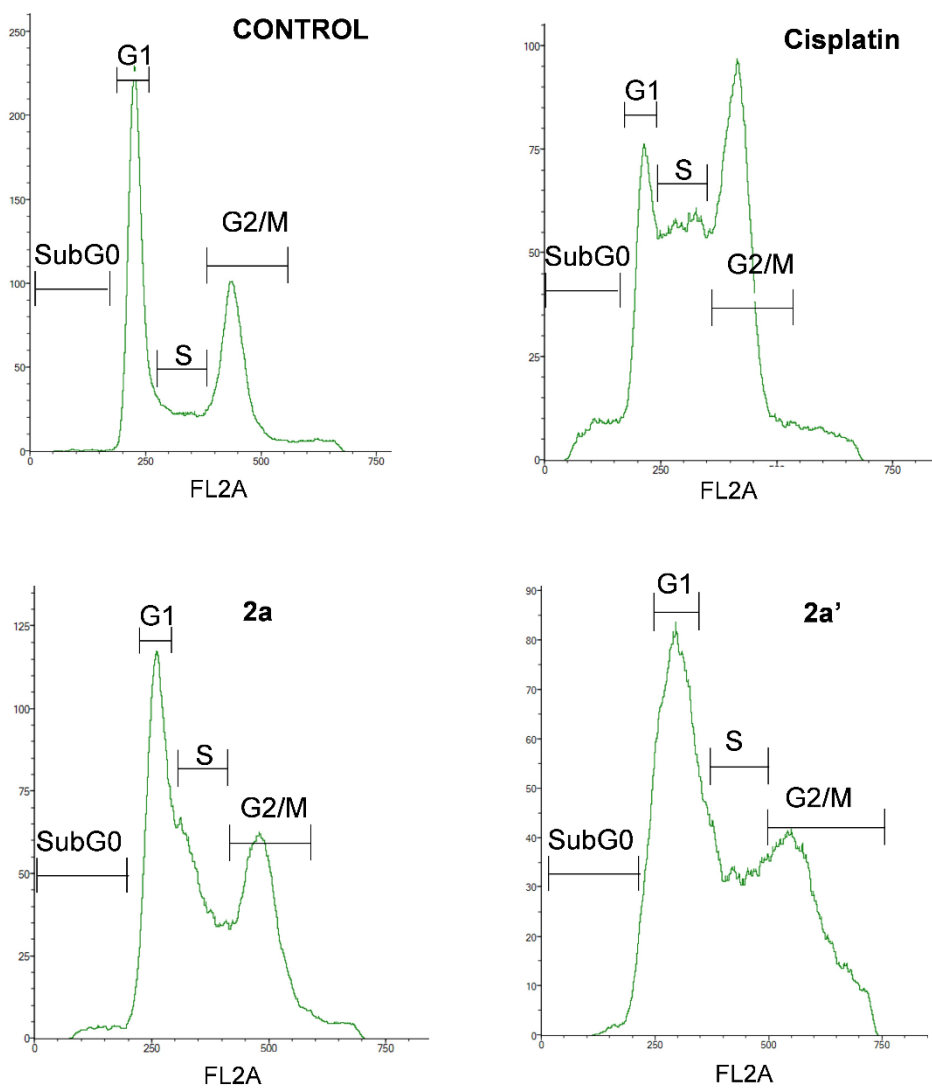

|                  | SubG0             | G1                  | S                   | G2/M                |
|------------------|-------------------|---------------------|---------------------|---------------------|
| <b>CONTROL</b>   | 0.3 $\pm$ 0.01    | 63.64 $\pm$ 0.72    | 12.56 $\pm$ 0.33    | 23.87 $\pm$ 0.83    |
| <b>Cisplatin</b> | 4.5 $\pm$ 0.22*** | 22.88 $\pm$ 1.03*** | 37.02 $\pm$ 1.25*** | 38.34 $\pm$ 1.99*** |
| <b>2a</b>        | 1.4 $\pm$ 0.78    | 48.59 $\pm$ 2.30*** | 18.82 $\pm$ 1.45*** | 32.58 $\pm$ 2.55*** |
| <b>2a'</b>       | 2.4 $\pm$ 0.34*   | 37.99 $\pm$ 1.11*** | 21.13 $\pm$ 1.89*** | 40.64 $\pm$ 2.32*** |
